# Supplementary material
Source: publisher figshare collection journal article supplement (https://gsajournals.figshare.com/ndownloader/files/23817773)
Supplement: Supplementary file 1 [file 23817773]

	MF	FF	PH	ELN	TNL
Dent_1	71.7476455324246	74.7011572437198	200.474400534321	11.4974199809355	17.0621660675676
Dent_2	70.0842848400303	69.9691939535392	171.841775424084	12.526585781948	17.6135330429894
Dent_3	65.0305182950623	65.8970085656391	162.778891377079	11.9560634608135	16.4328666447246
Dent_4	71.6355985997495	74.0625997075759	219.386425086901	11.0459554693764	16.3211848934773
Dent_5	70.7824238855383	71.6365801531577	187.094030618564	12.2087994652281	16.9344881007615
Dent_6	66.7274922235422	67.5153860234837	200.670152823552	11.9338516752229	15.96720556261
Dent_7	70.9933630479508	75.5353778211488	187.385760562894	11.5452524716582	14.9027811081869
Dent_8	68.0707563827807	70.5887157858471	183.587512259634	12.0616306634959	17.5316087189938
Dent_9	70.1003601359255	71.9558521227169	169.603464453102	10.5792263917693	15.5906448594634
Dent_10	68.1183507609403	67.3569743239769	182.490752684249	10.8760383553413	16.53900518212
Dent_11	69.9990210855542	72.3899583536746	180.985663386945	10.1547557434257	15.4663373005757
Dent_12	68.6618376979288	68.4223202625041	159.982794213268	9.9572537969458	14.7130818043834
Dent_13	72.2556974159537	74.3475017341811	195.831336436122	12.0710003665992	16.8657612808653
Dent_14	76.6836659942388	80.30519600448	258.451193481047	12.0293551842626	16.1880596028826
Dent_15	72.8514045925852	72.7458126032908	172.717340381116	12.0710821970338	17.6784754962045
Dent_16	70.1996092251644	71.9247122721919	144.726544507776	12.8560995186461	17.320072624043
Dent_17	75.9886849359085	80.4031214136147	190.161140928023	14.4468356147299	20.9947778719439
Dent_18	71.5686341003457	75.8641818068978	210.146720011196	12.5501387543124	18.783752164183
Dent_19	75.2684265398602	78.3501569174875	251.508222774812	12.8056530724185	19.2081676269561
Dent_20	71.1148424237317	72.8916685020409	214.888598356674	11.8351532188609	19.3995261636227
Dent_21	75.2271447376381	75.5562692330526	224.126719261112	13.1022080649154	18.9762361584927
Dent_22	84.7415185950484	84.9017187668497	238.728272539287	15.2103392014145	21.298793396226
Dent_23	75.8602280389331	77.8281784875029	232.484997785161	13.7155221196172	19.8293611199648
Dent_24	74.0323302735613	76.9740852389514	213.110204139883	13.8663695946036	20.0086047300366
Dent_25	79.676430253851	78.8832714226423	223.708330685462	13.223046088201	20.3588727914581
Dent_26	75.1993662513235	78.4351762134312	213.421396984539	12.0382600078397	17.8880150754323
Dent_27	74.6150368552509	76.9067650951548	226.184171330165	13.8637643782393	19.7989202612131
Dent_28	78.8035661605847	80.4103725434387	214.928172506881	13.8610975940459	18.7265434510442
Dent_29	69.5477217136483	72.2256593351156	203.491681908526	12.0580691693168	17.5619994557831
Dent_30	72.2688721003576	76.2444804136898	201.57357665062	12.4573183319322	17.9469219912975
Dent_31	75.6727472794333	77.4072383029163	220.527896224418	14.0147978180277	20.7568562165924
Dent_32	66.0511107600313	68.7234081330193	196.964754816795	10.1688368199763	16.1551754558081
Dent_33	69.0276847944127	72.0256428013149	138.956676303365	10.4496989530066	15.4666632213776
Dent_34	67.8190661670588	68.2550367546095	204.575168009879	11.4112942793451	16.1488204420712
Dent_35	63.5322377028871	64.4901236468871	166.620167344597	9.80170946265906	13.7896922004858
Dent_36	64.6792282321186	67.1702735449029	164.395192385724	10.3154802295589	14.7571794781498
Dent_37	65.0206291698711	69.7427786192989	162.018945786088	9.17743505033873	14.6476858119758
Dent_38	66.5533653653037	67.4985828729403	189.325509562368	10.4343341028635	15.181652084463
Dent_39	63.9319980732292	65.5871917114003	190.752302627148	11.316307204977	16.3432889150728
Dent_40	62.3859354721363	63.753582592807	176.440553997037	11.2384271429244	15.7565473821383
Dent_41	83.2774624104432	83.1997061060444	247.293120154216	14.2842314166593	19.8525045740464
Dent_42	74.480250574066	75.3310172909855	101.960539832838	11.6194522772227	15.0251526867872
Dent_43	69.4720692211827	71.3910540968626	210.750300962398	10.7618825155907	16.7717542567385
Dent_44	70.3371872206415	73.1552178870708	198.394281480128	10.3913467448827	15.8991377266335
Dent_45	68.9579123061788	67.5073985558636	204.708542719813	11.2010650922088	17.5056460575996
Dent_46	72.3042038770695	72.8435373817008	184.713518978436	13.3134073005409	18.8009323059658
Dent_47	73.4990493347971	74.5988677750124	216.162088014867	11.1315530795036	17.2788676783315
Dent_48	72.6651459395152	72.9810213790255	206.730248910245	12.6151566572673	19.7539613424497
Dent_49	71.7714223074195	73.703353839359	222.24793138848	11.8226071161519	18.9277656140988
Dent_50	69.1167063427435	72.2250975821775	227.51402051418	11.2463848441519	17.3395967306028
Dent_51	73.6369489671048	77.1165563277393	203.966249312954	12.1474819842823	17.366471027972
Dent_52	76.1037593381306	77.090666258047	220.507766098611	13.3391892310536	18.0639312487217
Dent_53	68.2900101694913	70.4920663539511	205.495664318666	10.9327713990091	17.6327796813755
Dent_54	76.691403121728	80.7263996246215	211.55734456752	15.6313896600699	20.8860811673929
Dent_55	65.3997720202462	66.9710831813734	126.663992545227	13.1016734342025	17.6980986259895
Dent_56	65.7494677521338	65.7761392548528	216.459539155197	11.9251962871454	17.427523125636
Dent_57	63.1455040505616	65.8167093488152	203.358404545972	10.1918197466711	16.638601483967
Dent_58	69.8125599395357	69.4442707975709	199.853227402584	10.4218175790563	15.9832561478663
Dent_59	77.0665042578569	78.9509111490696	137.019972432873	12.7742981191343	18.5105205770866
Dent_60	68.2330361387702	69.741756415922	161.076084974235	11.7070803185	17.297495751693
Dent_61	69.211651980777	70.9317809138097	218.989975188866	11.7407242090067	17.8695967745032
Dent_62	66.7052324999985	68.1651366248421	204.451802679945	11.9489203283108	16.9671334851609
Dent_63	68.8466633613853	66.9221246552763	167.791666705853	11.7644669170771	17.8480879027008
Dent_64	68.7371523295475	68.8319355390148	204.837379081473	11.1158855501386	16.6185272159861
Dent_65	75.5984991969981	77.7799007845945	166.360576079871	12.3071847469398	19.4120589670391
Dent_66	73.9319781335014	76.6143256323734	199.264939854506	12.1381338012473	17.3882386637761
Dent_67	63.8982654587174	65.1743335582004	135.052791727349	8.48220007308412	12.0663022926722
Dent_68	64.4266597866177	65.9310749141679	159.302721512026	10.8256290008775	15.8710808187358
Dent_69	61.8765681983073	62.302976022444	166.268878886086	10.020760925982	14.8467972958251
Dent_70	69.3993007372531	70.7538920181237	174.586990938969	11.117084473442	16.4535073187038
Dent_71	69.9088337015496	74.518002763941	160.028967736682	11.8703422080071	17.6484035958742
Dent_72	76.754948465554	79.2984471717019	222.861224679126	13.9122553780527	19.9644145360693
Dent_73	69.6623454137506	71.0516425263217	187.76468843144	12.7247443450032	17.1732094527544
Dent_74	64.1240235097468	66.4721716098688	166.88437310561	9.07620609930928	13.6483120325012
Dent_75	68.0686903326146	70.3082438645506	152.19175878394	11.4112891382779	15.4527771086265
Dent_76	72.4091104587172	76.7624881808747	175.638471070964	10.8028117804903	16.2324040259055
Dent_77	70.2343884862105	72.1447551466004	236.775750229903	11.9748840713472	17.6745254100097
Dent_78	79.3359139314472	79.6683698972841	207.021358946198	13.3484623168923	19.82483179525
Dent_79	81.4795551155412	85.2705344717468	242.852524409275	12.2682110954089	18.6616034595331
Dent_80	72.4311879483673	73.8879389478073	213.87225633177	12.2885651407274	18.8450979048094
Dent_81	76.6201424895518	80.2169229624605	218.883967212713	12.3889075851358	18.1461703268365
Dent_82	76.911974671099	77.9431170141661	220.911713645246	14.3199262544985	19.6806856924129
Dent_83	67.0819184447139	68.3437867607469	191.737730631853	11.421411024497	16.785406835415
Dent_84	75.0158939233451	76.9647936417752	234.426485808052	13.0980994149891	17.5497143987779
Dent_85	72.6759498732509	74.0305553597812	199.082637328603	12.1231422658285	18.2561034321705
Dent_86	66.3442675418031	71.3764540981987	207.64358106797	12.1573381533575	16.9837343127389
Dent_87	72.1785052217002	74.639062576647	203.755439600955	11.1067708897416	16.5404541519007
Dent_88	80.2010485709135	81.6019379701282	214.857517218849	13.1210546687129	19.1420058644006
Dent_89	77.6839700315611	79.7507810766305	188.139191090046	13.9590454157549	19.0593930562348
Dent_90	71.341153432063	72.2755050393223	239.164930609247	11.3173844122817	15.9972166473503
Dent_91	68.7951724059014	70.5985503303231	215.336990062851	12.061693868746	17.903484396771
Dent_92	70.6283691421386	71.4118941237488	188.323617960387	12.0968390273924	17.2530543194321
Dent_93	63.3690285633112	64.5304404665355	186.305756289664	12.3270432786957	17.9367820258049
Dent_94	72.8010556728694	72.7798090553865	210.562670982878	12.1587159743386	17.5648213749093
Dent_95	70.1370628894618	71.2914478929142	176.0611596991	12.813552809318	16.7757862470828
Dent_96	70.9491874355554	71.6180800630209	173.29039863393	12.4674590577266	16.1049971791732
Dent_97	64.9054241512405	64.3752023447889	173.592555793301	10.0847582569933	15.2149954204905
Dent_98	67.2367204313749	67.3430474635486	202.912237528928	11.6557424101221	15.8889456406318
Dent_99	62.3237569512054	63.3707509434958	189.886782131776	11.4647147258696	16.0187746903735
Dent_100	65.1034699591866	65.6969873407779	175.754074342434	11.7872847317404	16.3042638357967
Dent_101	63.1742085271851	64.5526835622109	147.85816468575	10.4987571301287	16.090634151352
Dent_102	62.8321461150484	63.4449692021158	159.540687270918	10.6790625438177	14.8312278273693
Dent_103	62.2680752862614	62.7862531042917	170.706167755032	10.4460473412357	14.3736118986042
Dent_104	65.2953886841814	65.033626371974	188.221308847613	9.6332015581361	15.5397284094608
Dent_105	62.362576573392	63.1419947587368	146.118107927263	10.5231007694982	14.6470014153546
Dent_106	66.2664885622901	67.3887906710732	197.289702773253	10.6624137409991	15.0268771861096
Dent_107	65.0837032684282	65.94600538491	217.245077991211	11.3090392160686	15.5005394444536
Dent_108	70.2263030504746	70.4025822279802	168.579274469492	11.7747544563792	16.0489511150058
Dent_109	66.2556933265391	66.3215174223889	179.713698921774	10.6990241954177	14.8426272741327
Dent_110	70.713533732102	74.3039813979446	197.378084425177	12.7495150233007	18.5788349127978
Dent_111	63.7642771879341	66.1922341930012	194.228167358808	7.87041614709679	14.4897242670039
Dent_112	69.537497547051	70.6226094737287	211.070747266775	11.4087718956849	15.9129079250688
Dent_113	69.3388557796115	69.9234050609041	201.250647982347	11.8953935782801	17.9370963780606
Dent_114	67.2104685048675	71.1782565286972	172.089809321298	10.8010968439635	15.807163644089
Dent_115	75.0083617368322	75.3056606638926	243.500438714033	13.557617637572	18.1772462647854
Dent_116	62.1133110194603	63.8210249872365	140.671788732147	10.459024058952	14.9974647468882
Dent_117	68.4671780814577	68.0475364069642	211.854266499207	13.0320137348677	18.3405078148054
Dent_118	67.5610127851932	68.2388626821188	203.362888892501	10.3623817853915	16.5234534038767
Dent_119	71.996415262481	75.4407731052785	198.157544422044	11.0785300701656	15.4496613901324
Dent_120	62.7829716333464	66.6051761768973	192.433205332213	12.2995927964047	16.9398246145449
Dent_121	68.7533601466646	70.7298777068719	166.267864783906	11.0298678885349	16.3485767035859
Dent_122	62.8877485698671	64.6640766233778	170.675707733571	10.1954405369203	15.7926143790825
Dent_123	69.5128080370415	70.9952379926594	239.029362334419	13.5622581775567	18.7210265610248
Dent_124	73.1797278379222	74.5278943263529	231.012535073038	15.0131158918458	19.3913256003854
Dent_125	79.5053860126772	79.9075262570596	207.848039897416	14.4480165848145	19.1218703686294
Dent_126	77.7711449183939	77.4576143987381	196.805487852336	15.3734470373692	19.7794291018238
Dent_127	62.8734380395483	64.4268493609608	238.688006835025	9.87126894482622	15.1999916677534
Dent_128	73.4931696517064	77.0723482371706	202.946748384673	12.2988945309968	18.1758436498157
Dent_129	64.1115088463787	65.6030651992727	182.555296167233	12.0334916666301	16.0294824191684
Dent_130	75.9455818254372	75.7915935273375	197.950320621202	12.3752364496436	18.3391036610432
Dent_131	74.5204018434216	75.8903186612594	243.149503844906	13.3625145646421	20.2321999058595
Dent_132	71.3572701459179	75.2452781344639	170.801383828455	11.7147576641308	16.3770339397792
Dent_133	68.9166148372595	70.9332205198058	232.190482255878	14.0716046778032	19.2621606421393
Dent_134	72.7866240834367	71.7462874580986	196.649000807102	12.57515372035	17.104451095687
Dent_135	74.2267292477835	74.9112170895734	241.565353294347	13.8613440348002	19.9367869848671
Dent_136	67.0693738099891	68.1432896086714	210.276325616606	11.8869100178191	16.732981870417
Dent_137	73.0600348364667	74.5115140912949	238.941361682651	12.1598763103405	17.5722875060553
Dent_138	67.0517101614053	68.9457077644848	181.663441748661	11.4509889108175	16.6226648944031
Dent_139	72.8495750524906	75.0342238537858	197.477470328758	12.3322532889179	17.6370449811936
Dent_140	66.1419908293134	66.6941259264414	137.160226269344	10.0080435111919	15.8735313533526
Dent_141	75.715174861915	77.4784397591818	242.363351080687	13.0770193621164	18.0958782757919
Dent_142	71.5207494373522	72.0678782365428	270.200866670419	12.2999477309911	18.1085894843268
Dent_143	83.3188666195556	85.1423920562471	224.136607068648	12.9848148733972	18.332265719678
Dent_144	77.340323677504	81.727052835044	175.922151502567	12.8224095423298	18.326098351528
Dent_145	80.3834289715259	82.271473445719	222.405167329441	14.9425453707278	19.8211928521959
Dent_146	78.1209535271517	79.8156959884587	241.980843339947	13.6252553723897	20.1080254711755
Dent_147	73.9480161074153	77.1281718858376	212.309096046272	12.5560153690589	18.4971688241148
Dent_148	80.6157603492764	84.4312805470261	199.063572604125	15.4968447171112	20.6332150252955
Dent_149	74.9800971120494	78.2826338871041	209.095454977371	13.5340545934939	18.0188138709185
Dent_150	64.2683097828605	65.6293578764115	149.824732393843	10.7203647643321	16.9102361433864
Dent_151	75.7209000288299	78.638962551572	214.848006474728	12.7326208674715	18.2738138384424
Dent_152	82.2602910533896	81.8569050566093	175.158148445933	15.0122939610472	20.4159666035958
Dent_153	72.8349464921363	75.3959016134214	198.186657981891	13.3834258654187	19.6212197149367
Dent_154	82.0132189509565	81.6697619211319	253.783687874088	12.524149953829	18.8866969331379
Dent_155	70.9568867556579	71.12624850742	179.655218838822	11.401669770277	17.3303009508458
Dent_156	68.3239913425549	69.8784738631996	219.353827416175	11.958626206064	17.2501204080472
Dent_157	71.1984956653509	72.3970805227796	161.976895614682	11.1287134104993	16.4143352004032
Dent_158	72.2134328924078	73.4187195039112	188.613639740638	12.6297716707668	18.197787705909
Dent_159	76.1800666443171	78.5751012233135	236.633396474417	12.887207234089	17.7161180175612
Dent_160	75.5521417273256	80.6004951398847	223.253962319542	12.0614758794846	16.8980323823839
Dent_161	72.960226512076	73.3397386602245	197.232391189215	12.5347821422267	18.3188118507174
Dent_162	73.3029111947323	74.5591089865848	177.949218439612	12.3259664247458	17.2682805586112
Dent_163	64.8875907608166	67.7479998789734	184.973199352962	9.93752031853269	14.1640720622767
Dent_164	77.4916580400545	80.3352155208223	210.181498210034	13.5988138348448	17.2762184572066
Dent_165	76.9186853698032	79.7928286968871	233.594961324438	13.5443479527081	19.6846255260734
Dent_166	78.9999614032629	81.1696670667568	210.925033822845	12.2324343877274	17.6057530790114
Dent_167	80.6254275831791	83.4725957221105	179.233617069808	14.1820154752102	20.0959916149832
Dent_168	76.2985544375787	78.848238430057	245.559537626063	13.1983078951586	18.8859069579758
Dent_169	70.3368467115199	68.6237455678497	236.393778851691	12.1087234203428	18.5015636251828
Dent_170	76.1466482795408	77.2811145650156	227.815303508229	11.5565872998987	17.5329160983669
Dent_171	69.4397648378181	68.9264038989109	186.197309142885	11.9108930751896	17.1737327532123
Dent_172	72.7391944815541	73.8633346250647	214.730087272175	11.8629739198794	17.6433262451289
Dent_173	81.5257677388431	82.4445184421704	237.488038684104	14.0922234785954	20.2011462454002
Dent_174	78.4526026486068	81.9954988918768	208.295498938979	13.1047002987423	19.7588777359809
Dent_175	75.6979440963549	77.8789993394552	228.668720505933	11.1462903553401	17.0242801110495
Dent_176	72.8614630206849	74.7214106747054	179.766131102776	12.3523877266581	17.2240535998395
Dent_177	73.7533450254104	78.0175593170638	213.654963709628	11.3078012814092	17.0132731273416
Dent_178	80.5754371458628	80.950499852385	226.775791106838	12.3805540167731	17.7006743303074
Dent_179	73.2321340480967	76.6347127467675	224.914012713635	12.6267353257885	18.1837309009311
Dent_180	71.5071466595712	76.3263825160746	189.313400838551	11.4050644394857	15.7146063067313
Dent_181	67.3175839703718	67.1370145924079	189.791102473915	12.5191356355761	17.5697524937299
Dent_182	70.1508560830766	72.080638729031	198.645843727284	11.4318437272965	16.7545304012166
Dent_183	79.8988172639493	83.7448863034536	210.435668968449	14.185028648904	19.8002009961585
Dent_184	71.9427953297953	75.8697047752358	231.915235924158	11.9566858743329	16.8655837284184
Dent_185	68.855271882769	71.4051566144848	199.610910800649	13.5234257058314	18.1614966069524
Dent_186	72.7274523489773	74.6612629890631	189.488791948256	12.5073207340214	17.4491767957613
Dent_187	62.5409842832366	63.7188349454317	171.351156567047	11.1869603340341	16.7357145708411
Dent_188	81.7647314387791	85.0982793262403	208.725352074425	13.9022717396159	19.240549488328
Dent_189	69.23940756775	71.0110629566958	177.542057211985	11.855712939586	17.2732641536266
Dent_190	76.4276576618467	79.8315222824704	216.689156926241	12.8829321442666	17.7125945550778
Dent_191	78.4626779329931	79.8138548021717	220.249806052606	13.3940702385087	19.2134188004707
Dent_192	74.5123987324413	76.6423133092457	171.209806407725	12.0096762104144	18.615732251252
Dent_193	67.3395733186933	70.687810953123	179.248117278603	10.7971479670814	17.2109686718733
Dent_194	81.8118848485782	83.8105465776592	201.080843265488	15.5989334917063	21.4245044515134
Dent_195	64.3028644708576	65.8854961221369	169.474551402621	10.5572318315791	14.7089683905333
Dent_196	68.0475813811167	69.8343250952469	181.404869388283	11.581289442544	17.066152016536
Dent_197	66.2428464706603	66.2294133215502	188.010580043276	10.4240422673837	15.702573314811
Dent_198	70.7780680668717	71.1911308785609	197.336317166825	10.7150933256258	16.3702387036566
Dent_199	73.6639484035077	77.0885033181101	226.225334179513	13.3850280138402	18.4234569761728
Dent_200	69.7472029437608	71.1456046697572	201.245571979935	12.0170426332437	17.9312970416588
Dent_201	76.7835934408668	77.2167701662069	234.29299549504	14.6332292842477	20.3147342482507
Dent_202	75.3513237609654	79.5352006235918	201.639026814982	14.1093311293248	18.9999171731
Dent_203	74.68859383909	76.5356292998797	252.254629138368	13.1096401797713	18.611707322922
Dent_204	76.7450627645563	83.690332480849	200.517728029047	10.4178332561049	15.0706996206379
Dent_205	74.5743009227025	78.2494600625893	167.31339993974	11.2821561349359	16.4535678076277
Dent_206	73.6804784634954	76.651255670342	236.597889674919	12.8096483313658	17.2939740517028
Dent_207	73.00730487149	77.459175169959	192.833649082891	12.5262209786361	18.4905361494763
Dent_208	66.5189076169988	66.98740562866	156.383386350098	10.1039678372848	15.1663618173268
Dent_209	64.1208092042345	68.113309818122	171.273271341559	11.0826273272236	15.9891141510909
Dent_210	69.5974914161796	71.4110473378722	193.461737068458	10.8690971871465	16.2083523583154
Dent_211	78.7045176478476	83.9293164528544	232.020355692604	11.3933512442223	17.3835107175714
Dent_212	69.5354225130153	72.1788360496236	189.959209356124	11.0569206293913	17.3275177038986
Dent_213	65.9405982876056	68.0031624760415	178.040011028856	10.1873274537942	15.9388929733722
Dent_214	74.0765579481787	77.0836325463592	225.988244391641	12.9309874399244	17.3511362208217
Dent_215	69.1056433154988	70.2634184191257	209.74399694538	12.1022838997248	16.7004811932235
Dent_216	71.7921593479233	71.5705575430168	212.967061736986	12.0231512901787	17.73471429511
Dent_217	79.826236147969	81.1061172774722	211.655652034432	14.1569862217281	18.046166700391
Dent_218	81.4197596471839	81.5096621000301	228.778268800008	13.5940304296181	19.9134672808054
Dent_219	71.5645753154819	72.2933794766342	152.78485270936	11.1006476329964	15.8526155659094
Dent_220	68.8193726653403	73.0399104197315	191.408729008213	13.6022597052318	18.980504497513
Dent_221	68.8210777530668	72.1413220867742	204.79211331933	13.1609409726972	18.4205305806335
Dent_222	71.2944980045251	73.6528877447263	208.824070446359	12.5654169584153	17.9822157488614
Dent_223	74.4916287500447	77.4979975059903	221.823320391562	12.9935948247277	17.7921300996193
Dent_224	80.0544698699302	82.9234837368731	233.316322390643	11.7324290169551	17.0087265095156
Dent_225	76.0859480427912	75.908469705626	233.832224359967	13.2481901121542	18.7930693237384
Dent_226	70.3235787509436	71.353810597945	207.464457972656	12.5133075459292	17.4151059257839
Dent_227	63.8923965796502	65.2426805550686	181.411632314865	11.5784206207857	16.7455099262464
Dent_228	74.4178581119614	75.9682583102713	221.880509457566	13.2214850958808	19.300680324448
Dent_229	69.4574782084691	69.5173630493172	206.740139339502	11.3376214098842	16.0258396879713
Dent_230	75.2909346602203	76.4657208937273	202.221070704907	14.7830834622829	21.1163230502277
Dent_231	68.9878821005429	72.057949211219	219.696262461358	12.0370460083535	17.598431745808
Dent_232	77.89404534395	83.4170486228766	197.649952104952	12.8585061715255	18.939413394452
Dent_233	78.3419362191024	79.8731285494517	219.561681092654	12.4358673674007	17.467735083318
Dent_234	72.996985583193	74.9972272501639	219.560255686963	13.7275552373546	20.2347260619513
Dent_235	75.9342656299288	78.9577781515209	247.016449027295	14.6851919504698	19.728529391392
Dent_236	70.1864438570849	71.390486101685	190.096928593572	11.4555058910827	16.619048046083
Dent_237	66.2123525979294	66.220542589512	197.924420669703	10.3549696985465	16.6330549300482
Dent_238	65.2983952958738	65.5241464385737	211.422274715755	10.1925216039372	14.8909912617511
Dent_239	65.9956113538843	69.5570157472185	190.14941283397	11.5385011062074	15.8428747002771
Dent_240	63.5999710472772	64.0575292498412	161.426881312647	10.1937056642456	15.4344126867677
Dent_241	64.9143389800729	65.7042544425428	197.888241808701	11.3803103997364	16.3604000512612
Dent_242	66.1898692266585	68.2853097049611	177.270340746106	10.4748133302705	16.0811850175181
Dent_243	64.601554964362	65.0942889165619	181.633994954773	11.2210394561517	15.2974061147629
Dent_244	64.4610041112756	66.5797947105291	186.122060233095	10.933369837158	15.5622169531587
Dent_245	63.8466530557405	64.6627537299116	196.019045292803	11.24756187044	15.6945126010234
Dent_246	63.9938389634868	64.8072134795806	189.231694981231	9.90881774643477	14.8660089869598
Dent_247	66.9748507287203	69.3724373953971	166.137826756964	10.452792407495	15.1647992067136
Dent_248	66.0333348989243	69.5864468173374	206.264771898315	11.556812461792	16.5981552619292
Dent_249	66.8522249460711	67.7575493400262	199.772977125712	10.9613627645697	16.8960836717317
Dent_250	70.2825080767616	71.2871756894247	204.360073204763	12.6222546453594	17.6557607008906
Dent_251	64.4423453263962	65.978136012471	169.188521423795	11.2006458246237	15.0982204057633
Dent_252	66.2769607873739	68.2573096556353	198.450701382642	11.2254162380121	15.9973729326052
Dent_253	68.069197253849	68.6497812339852	206.218930726416	11.8639573733708	17.1086228429573
Dent_254	63.7759968111938	64.9940704562865	200.629418123891	9.95734889682638	14.5071678655174
Dent_255	68.9072055542746	70.3414030222609	218.707031218122	12.8421713436451	17.8156133743914
Dent_256	67.8326022491619	66.9299275084983	199.465202022761	10.0818607863723	15.7650093358948
Dent_257	65.6350922392972	66.8393931566383	180.043279974041	10.126604558701	14.8097838705086
Dent_258	64.8270555853313	67.3753293674628	212.554978895752	11.6584608074568	16.8053347145894
Dent_259	67.3236456022129	68.1792103840546	206.517032265739	11.5519077512187	17.3158015357618
Dent_260	67.3283563752151	67.3174877528112	186.231457340005	11.2081061203244	15.89039258247
Dent_261	63.0321866065429	63.3628156980304	185.232413215377	11.089508446177	16.0115718279437
Dent_262	65.516635634	66.5364857638728	174.516711407	11.4451676799382	16.597703484339
Dent_263	65.9700087331798	68.0246028614441	207.062512298078	10.7285818693934	15.0189802664884
Dent_264	65.2544798894355	65.778019458172	224.881443234644	11.1272204320384	16.4964115343333
Dent_265	68.6928885882693	68.5615573918376	196.511376819035	10.7839886154828	16.4711827081998
Dent_266	65.1797165017495	66.3044575877382	191.956546580065	12.0865326674082	16.1127472509623
Dent_267	65.2701653627835	67.2021838390218	186.741856065402	11.3618787222703	15.5528295665254
Dent_268	65.984460469291	66.3342961498591	197.257380673994	11.3973587793467	15.8721213233358
Dent_269	65.1208615177456	66.4814805219633	177.72517234641	10.572115705751	15.651094075212
Dent_270	69.1461893206493	70.34077967788	175.538636569928	11.9249392523508	16.1168181152713
Dent_271	66.0598699465476	66.1889313098004	200.159502999181	10.4593183664759	15.9903389019856
Dent_272	68.3608620632758	68.1589155077974	205.551109761247	11.6907598621851	16.4005685207339
Dent_273	65.3331126372225	66.1183420090034	190.491176412697	11.1885837312662	16.3094274394374
Dent_274	68.003901391012	66.7194971490065	173.12017634738	10.5614815025314	15.1923184639903
Dent_275	63.0933835443567	64.6981368105785	192.68715333982	10.3216472629362	14.987566947088
Dent_276	65.6945837139715	66.2324846940043	181.432585910369	10.8199167055777	15.350162266079
Dent_277	64.4007653063246	64.8659719800947	187.559833402226	11.4764009458902	16.6525281457359
Dent_278	66.2588170565124	66.7686907593227	180.616841734382	12.0691136491935	17.7531022558684
Dent_279	72.953742520186	74.3834042759735	212.759010101786	12.6547092317954	18.6179865844129
Dent_280	67.4102522307086	69.3895943118684	176.695907092066	12.6629826777071	17.4400490391348
Dent_281	68.45578842829	68.309201147099	194.411218461283	11.9773921964084	18.1081443195465
Dent_282	63.9555730554596	64.8265231930883	171.990806725431	10.9150520278538	16.6239955469741
Dent_283	63.7714377681395	64.1644275066295	185.19429903235	10.5104817630268	16.1179638217443
Dent_284	64.1155064292788	64.3041688951678	162.259524662736	10.86045020936	16.8036239982762
Dent_285	66.2499459330236	66.5983077935205	185.32093273399	11.1138221989913	17.0357018565075
Dent_286	67.9148829663862	69.1347092875126	191.795723876545	11.5644163376079	16.0031211398263
Dent_287	77.7724314029745	78.2142750970308	199.402997297932	12.3015221995127	17.4584305240717
Dent_288	63.7221470752132	66.8551791360475	160.237550862065	10.8785533754904	14.8800972278356
Dent_289	68.1214217250129	71.9231002612924	156.711667748278	11.0624350955549	16.4347557663515
Dent_290	64.2212971764451	65.9429297760825	183.747588925146	11.0635675748189	16.3922092118997
Dent_291	67.5240712247962	68.4736208135833	180.210509508233	11.265570269845	16.4812482202981
Dent_292	72.3902160043126	72.6410639642334	234.217041244876	13.4288186615268	18.4369455234517
Dent_293	66.4642524979277	65.801560404557	177.219429989927	10.7528105743804	15.4749918668409
Dent_294	73.7595537657348	74.8347395146808	185.399255677751	12.9346824171705	17.6115331039654
Dent_295	70.9323527179172	72.593374353638	201.084026327454	12.2524655763983	17.4257015077744
Dent_296	68.6940529967117	70.4058278621462	173.823594060643	11.5080483159201	16.6948794338003
Dent_297	66.6045884200697	67.8685276350261	182.996503238674	11.7562072585318	17.5036962121898
Dent_298	69.620928177743	70.8131186474936	138.925891066498	10.6339627882091	16.4926676505759
Dent_299	75.2671193426986	75.6888275993082	218.06428817187	11.9932455780116	17.9443391046822
Dent_300	68.2787200255791	69.0491521732283	181.085962234645	10.8130873207842	15.9241104001241
Flint_1	79.0795453231028	80.6090239885617	163.635209623251	13.7653681960756	17.347914116551
Flint_2	61.2949769203103	63.6454467307573	180.039554716504	9.14651453769321	13.4814835084199
Flint_3	80.149426117823	80.2222103797119	178.418062675356	14.8209086803706	19.765203315773
Flint_4	73.481375769109	73.9132591325376	167.525938625597	13.4025942928138	17.9667360504379
Flint_5	65.6652455606564	66.2665366604586	146.102612595023	12.1946902217407	17.358624659172
Flint_6	62.505230504229	62.9742899115614	183.497715257947	9.8922631014845	14.1860223794025
Flint_7	63.6517727870564	63.5951599606755	166.626709782864	12.3824970384473	17.3321574734394
Flint_8	70.1723156004061	71.6316319768571	143.731994484369	13.2667812551723	18.0949057506114
Flint_9	66.3306754533291	67.493187092561	199.314176100532	9.84625188175015	14.4947447287497
Flint_10	58.769854426951	61.9125626483463	148.130319054468	9.05945082510775	13.4581421650255
Flint_11	57.680686046309	59.2180230530417	182.198954372846	9.2514640531173	14.6622888608722
Flint_12	61.3704884053884	61.4577198924682	171.089326054514	8.61900824045997	13.452982261007
Flint_13	59.7638634228279	61.1838319634195	147.41929436001	9.18199362427988	13.9924277550284
Flint_14	59.1845782553129	61.2021265392697	197.306193286769	9.5435740908861	13.4876071407521
Flint_15	58.5293524557932	60.6100342778324	163.544220262023	8.79845807851034	13.5727756446411
Flint_16	58.7340558407515	60.9335516988106	182.272094627383	8.86712293235223	12.7040979789901
Flint_17	58.2495550480196	63.1926981898874	133.178705832787	8.44018859686906	13.7873026850862
Flint_18	65.7847401051846	66.0825599170945	184.782795001591	9.52998695760842	14.7322312685265
Flint_19	66.0485316232958	69.6892227671355	182.11482390178	9.98514433275608	14.3519545116338
Flint_20	61.8551049142282	62.0054069237051	143.841829477036	8.98654331172072	13.5079121419501
Flint_21	61.5709429260587	62.3920365973675	168.504535300008	10.5505170211003	15.4287691494682
Flint_22	62.1323811703538	62.3688905887222	176.185757750696	9.86206931216488	14.2000892630971
Flint_23	62.7706754653367	63.764592266162	146.890609777117	9.58827807877016	13.4177826802674
Flint_24	60.4915448496301	63.2135817656394	125.999718673611	8.18850970798866	11.902795407263
Flint_25	61.2687762667618	59.9815394506311	171.263115474566	10.4625476996472	14.8999383007738
Flint_26	62.3213799500764	64.3059990567317	195.034351223437	10.48402728321	15.5749647415701
Flint_27	68.2042808648143	67.0487081384542	130.786157617746	8.70291249121592	12.7754738032066
Flint_28	62.3595058099247	64.5031535215579	180.876407525342	9.56084266275778	14.0779284696032
Flint_29	68.2977548570119	70.7779226639612	174.999335243468	11.3745646478743	15.9352012302867
Flint_30	61.7874869126144	64.0987362227392	154.924129031425	10.1593375368545	14.114962613677
Flint_31	69.7465774317585	72.8249535332099	153.432361111968	11.9183805360017	16.0470122019188
Flint_32	62.6596425750001	64.0160653550444	146.685095996373	10.5283498517323	15.8119399584185
Flint_33	69.266606617605	71.8736931877356	200.177868464098	10.4353017273207	14.0475148921699
Flint_34	67.7075761577435	71.0365255949597	172.414699550889	11.8012128135294	15.6495902953585
Flint_35	72.8171373971878	75.1697541496374	176.55551218535	12.0368916074587	15.8929442556655
Flint_36	65.1111820426627	66.3780929677166	179.109148174305	10.075984628418	14.081322841862
Flint_37	75.5972612608588	76.6654680610526	180.090928531942	12.0714580458002	16.73009834381
Flint_38	62.9936877507405	66.578265599939	192.055587438242	10.3455567754989	15.6885482360279
Flint_39	65.571442425532	67.8973234252245	168.901839053821	11.2175789480632	15.1349097846723
Flint_40	65.2606228538813	68.7915515172038	173.241582933209	9.73038452220038	17.0737254678502
Flint_41	69.6132495752015	72.8237967419815	213.879301323938	11.0344589669249	17.1539337410665
Flint_42	71.161533293044	74.1906379810912	214.349698002705	12.4947578658738	17.6351023693963
Flint_43	63.2907759485873	67.9277212722797	167.443114724068	10.6328699717843	15.8470917392538
Flint_44	69.2473008145878	72.1353263333835	189.176311024225	12.0628676691213	17.0271527914481
Flint_45	63.7922635431287	64.362782769741	160.837622055232	10.6448486775234	15.3152310194097
Flint_46	72.5956610522459	75.1823383617981	178.383311700932	11.9970451058121	17.3490106450804
Flint_47	63.5750464223003	65.4481018181415	166.16777136658	11.0008823860556	16.5177924721654
Flint_48	59.4534929772107	60.7903871782488	153.063564856439	9.86735987029726	14.3386356501868
Flint_49	62.3889589202294	66.7363834951206	155.274884477144	9.8810781690846	14.5134542324417
Flint_50	65.1073265464229	67.488226690832	199.67933337339	11.0450793643181	15.8572676273119
Flint_51	63.1103156969548	63.3007591034031	182.994580804891	9.9851862407143	14.2372587962112
Flint_52	66.2259313021027	67.9124986270491	191.702348715021	11.1324724619146	17.189320881652
Flint_53	70.1385007977373	73.5959169291728	167.877091559765	10.8269726103547	17.1441334504401
Flint_54	64.8679780063651	66.4001867205511	174.262879917741	11.2128609920054	16.077585739552
Flint_55	65.5448674461327	67.9778882354044	201.033315820395	10.5739940276048	16.1616415933293
Flint_56	65.6271275697028	67.3030534421471	174.782560569499	9.36375457730948	13.624721450019
Flint_57	62.2381521924624	64.3794538794216	159.481638577679	11.2873386822196	16.1281480052417
Flint_58	62.6733648881014	65.1546414212736	189.449525717645	9.37197878642825	13.8670797939374
Flint_59	62.921120343341	64.0928704533612	187.209605956466	9.95165235850962	14.1588477693367
Flint_60	66.4846532789256	69.8592867301036	147.954598287151	10.4424193038826	15.6184433763176
Flint_61	59.6638753337634	60.7512069776742	144.964020718004	9.50528972447285	13.8369394413367
Flint_62	62.0001160276828	63.7325978565669	146.338093867007	10.4340198966537	14.7840224026423
Flint_63	66.7002729747329	70.422747680294	172.295917900714	11.2656957400738	15.230475166615
Flint_64	69.6674014957287	74.4259980200159	182.174035523734	12.0025532270839	17.045896604025
Flint_65	65.327559022024	65.9254936464077	173.915722449416	11.4781523575168	15.9301771197085
Flint_66	66.5172126995845	69.8605876545002	202.631303101934	11.2284354101489	15.2535623290228
Flint_67	69.8938315117104	70.4710107829737	147.301811958519	12.3178396200895	16.5087057949391
Flint_68	68.1111611412194	72.9608038499567	190.761454121522	11.4816475439322	16.7832059800041
Flint_69	62.2162141228756	66.0294185314375	165.548158426654	8.98345631878052	13.0975899070108
Flint_70	67.7733187921317	72.0593042028909	208.935813186162	11.2707825052975	15.5199008168413
Flint_71	62.0315480614334	61.8296936612156	146.113465518563	9.89110394617282	13.8273794557556
Flint_72	72.798843845977	74.4110779528234	187.059128450886	12.9622172741679	16.7494187525198
Flint_73	71.9038543080214	75.5702618266248	191.02898057918	11.7328668466117	15.6298619552566
Flint_74	70.4009274282421	72.4636817725471	181.230977672155	13.0699843926062	18.4630245596115
Flint_75	69.0878584139915	70.0918040255112	171.240702096113	11.6540117538174	16.3498020503477
Flint_76	65.650150165163	65.9193790228732	145.981661805241	10.8039517909742	15.2970003222369
Flint_77	65.9867884113253	66.8929389281006	165.939129568614	12.3658894150568	17.0958773856785
Flint_78	66.1637398739731	66.8334445114111	126.455576974647	12.0934379551007	18.9098002171747
Flint_79	62.2598424806818	62.4105683075137	160.995813514701	10.3943037083204	16.0522646687891
Flint_80	67.9710286047282	68.0553596397284	191.799368504458	10.3997959118336	15.8443293854781
Flint_81	58.9442377462974	60.3457702064723	138.667202417066	8.07635208086715	11.0589882310322
Flint_82	73.8443104041989	77.6507544212709	162.570618821018	13.6286042161962	17.4164056874427
Flint_83	79.7198030966579	82.7393370373484	228.781846214769	14.7759073473419	18.9993111274302
Flint_84	77.5318616550368	78.12346086277	186.815169065384	13.4626719618857	18.5430240703528
Flint_85	79.576637846289	84.5069795565062	250.703837606319	12.5942748820987	19.4010342885252
Flint_86	69.491874378643	69.6216215359184	188.50194991767	12.8627975539553	16.4988093713765
Flint_87	79.8088025119271	81.5890627859185	197.333356222985	15.267760582827	20.2683811440798
Flint_88	80.5227941780105	82.8879183141842	184.772093758575	13.148290593745	18.1866088086671
Flint_89	75.4719627333564	78.5179135454781	196.275300119364	14.116603045639	19.158726231298
Flint_90	65.2909736221493	66.4910817549388	143.012628518565	11.1396771903873	14.7627684030612
Flint_91	71.8234490334633	74.5406283846378	187.552741266975	13.5137363136443	17.9679150965138
Flint_92	70.6065103980344	72.4519513230716	184.019793852538	12.1306663048747	16.8839998856125
Flint_93	61.9235901526705	62.6348403909164	149.328976797915	10.5547402051734	13.6623173791099
Flint_94	62.7863887523045	61.9248610524815	199.169628667145	10.4315731359536	14.3016717367066
Flint_95	62.2057519425628	61.8199923413188	210.495843428647	9.30932229337569	13.228400096999
Flint_96	62.334642707856	62.6707105415303	193.060544175033	9.03190858568632	13.0224947612969
Flint_97	57.568000777231	58.9441965910842	138.722874981048	8.26369655328634	12.3619344644966
Flint_98	62.252586184026	64.9023150808592	160.33555975293	9.27070811529902	14.4629472311897
Flint_99	62.7635753939206	64.9904838967601	180.426997647148	9.99884033667255	14.9413869958266
Flint_100	61.468606359426	61.915123817886	157.067816233977	9.80890578837647	13.3982911348166
Flint_101	62.9009796261074	63.8563687728929	174.008967333592	8.45288424013747	13.2292730230535
Flint_102	59.3707113877491	61.5952370919459	152.326933843571	8.9959391763964	12.9210818502171
Flint_103	64.0266154848986	66.9675693691119	179.123930694395	10.8272500118047	15.4288079589141
Flint_104	63.0032273364512	66.1711021284571	186.548423003983	10.6656245598134	14.8892496722516
Flint_105	61.4126350192373	60.5747364782129	168.165585950209	9.55687737880773	13.4284064821857
Flint_106	57.5894962960476	58.8260221313033	151.814837293157	8.77539381404835	11.9128442129199
Flint_107	57.2708479766276	57.5852820681361	133.020831179861	8.9964893060225	11.6766117137462
Flint_108	59.2803038182008	58.6939771266155	154.819483512693	8.32834834039879	11.5384479725306
Flint_109	62.1767931727367	63.180389719618	168.500219981965	9.0333220738481	12.4567180709775
Flint_110	66.9238536016891	66.4383817739309	134.438299821616	11.3132325631181	13.7328922866639
Flint_111	60.7345577455995	62.6134067801462	128.793866865869	9.73202617024647	13.5074862427867
Flint_112	57.9768027880551	59.9942534767944	188.814257042958	8.44860211287219	13.6656451916667
Flint_113	67.5796196581358	66.844177976231	183.304088559315	10.5110436717183	14.4922065965883
Flint_114	62.3316102415412	63.9850514770966	175.961982665996	9.29766675441913	14.1507469779952
Flint_115	68.2944509769244	70.652026708105	140.288068088579	12.6452330822627	18.022226832939
Flint_116	65.5321206010063	65.8676778526063	172.088085119222	9.77621629784689	13.9498238169346
Flint_117	63.0246259299877	64.0108502789379	178.182078353986	9.60071635443791	13.5662444247602
Flint_118	63.871887944097	65.0123499971448	218.691468630418	11.2386250076459	15.6375252899412
Flint_119	61.3454197074494	61.0924539893161	164.57685137252	9.24885777418937	13.1214893783725
Flint_120	59.0435268990177	58.9264675949223	167.499467742439	8.72634745174775	12.1474282709439
Flint_121	60.4292453299533	61.2473152662111	166.848983242621	9.27057048623799	13.1207506067234
Flint_122	58.6463924682934	61.3104656010708	188.095560635265	8.99809106235866	12.116207357133
Flint_123	60.0715178699461	58.7197382893212	167.890267939173	8.7494103359229	12.2714234511366
Flint_124	67.2500615741459	70.3675920285466	201.603479921738	11.9614414805929	16.8842737518726
Flint_125	62.0252767981635	61.8008829580823	112.84485731174	8.86360409774532	12.4060638816909
Flint_126	65.7190978965147	71.4117747552498	168.63017643638	10.4639546621719	14.7573815062096
Flint_127	65.4707663119683	66.5591966072845	188.177187427387	9.70814013239563	14.4203198948166
Flint_128	64.3226433808536	67.5887596465887	172.179090553328	10.0227176594652	14.114668886466
Flint_129	60.6750123653839	60.9417324334897	163.877936915283	9.10044633001083	12.9557807783473
Flint_130	65.9875860218748	67.9924015022719	175.659912455202	9.96200086907479	14.6374229214237
Flint_131	64.9440197300474	69.4697305251538	166.073991025033	11.1932282870301	16.7579081979318
Flint_132	71.2263110776957	74.0599576217263	168.66813086204	10.6610062586179	15.5036355747875
Flint_133	70.2749378435854	72.2164191317405	180.956248618212	10.2109360259859	17.0247915608699
Flint_134	64.4628376920146	66.1237422129048	143.177236680657	12.1362745954843	15.6074170095157
Flint_135	66.9554588984726	67.199053490943	203.698088234258	10.952779086348	15.1965410015902
Flint_136	74.5420989053596	75.3844176916878	171.560913191907	11.886944914245	17.4984729205522
Flint_137	79.5053763771684	80.2964250231212	199.26583021282	14.9585613381347	17.9073244397197
Flint_138	60.7895162680329	60.7679409935221	177.927520139228	8.6290251690636	12.5808589666212
Flint_139	65.9735387561495	67.5860444310777	193.400727193085	11.2034922574777	15.6973203242754
Flint_140	58.7782480930002	59.6495288332081	167.430067371739	9.54226137824241	13.0558225996518
Flint_141	58.7715281105766	60.3732587593882	118.545080712897	8.97448145891514	11.6927603210572
Flint_142	62.1346614182148	63.5031152819026	179.41834438422	9.7906271451851	14.2349308812992
Flint_143	63.4200286296817	63.4615589243541	135.197465918571	8.80895596103397	12.0868839254668
Flint_144	64.4893264482156	68.51683614077	142.458354221184	10.5666527395067	15.4061322354606
Flint_145	73.6442141272579	77.0837142788223	218.749307836296	12.8258471833343	17.7187046227522
Flint_146	62.2946535170608	63.0558402921496	161.293022461729	10.2991901555085	15.6410830272318
Flint_147	60.5989957602194	61.6987311201952	131.51417725742	8.54573924833279	13.0182131848177
Flint_148	61.9437896965688	63.4692172913849	155.354722040672	10.0429682584077	14.240396686502
Flint_149	61.2279632548749	61.3925173039348	179.73868121485	9.60793960531454	15.2200430729186
Flint_150	70.1977112793478	72.0847177638385	209.21516232002	12.5684411203874	17.4213813350393
Flint_151	63.0355630094455	62.4345881275263	120.275616910962	9.4557038781949	12.8466836472654
Flint_152	59.1443644666464	61.7464139910295	115.847535256859	9.97818209885428	14.3645876908191
Flint_153	61.4577465989554	61.1691078317918	137.538206084296	9.93853001061646	14.1162010105047
Flint_154	66.6313400234209	67.0021154957583	168.294511137081	10.3021652269228	14.066923530226
Flint_155	62.9651540694937	63.3898760871367	140.15195037355	9.88438784298441	13.7378653951184
Flint_156	61.4492570497281	61.7241527375289	133.490221692906	9.84754737131087	14.2545724983476
Flint_157	65.0667628693085	66.7689814086284	197.516994830433	10.5797186894847	14.375810944285
Flint_158	62.042907560104	63.8674795939062	183.0652289745	11.4476541112401	15.5973935891535
Flint_159	70.9447884961662	72.6876474437731	198.744692569325	12.4526428186571	17.3190618928276
Flint_160	65.789819203665	64.558368643608	187.138546958857	10.4747454829769	14.7937645331299
Flint_161	58.7722214113212	60.2269017086865	152.685836340202	9.15335922496232	13.2638480386641
Flint_162	63.72238909601	65.6323605482795	167.631312374875	9.91047510129998	14.3502646770738
Flint_163	63.0753883009772	68.7796181366447	177.135797704393	10.992705518225	14.8863979333729
Flint_164	64.9340186707038	69.8722555547729	166.139399115167	11.4624645463	16.374533736896
Flint_165	62.1690720349005	63.4648329994441	136.23161377448	8.84873175805432	13.0284534458177
Flint_166	61.6301737532943	63.0507382557947	140.635997470222	9.64213072029981	14.4010051482999
Flint_167	60.5366548385122	62.4282030141973	184.304022741321	8.70301670565552	12.9976224025505
Flint_168	65.9235516861343	69.7511302755557	137.983544492073	10.2854675098038	14.1920271889383
Flint_169	65.6964264457767	70.2738062495934	179.80660033049	10.0356672048661	15.5202554575195
Flint_170	61.5536112430101	60.2111704869429	164.601264475199	8.5702356794542	13.304689760253
Flint_171	62.4348206659045	68.0745618623966	121.986171892928	10.644854160138	13.9758247491206
Flint_172	68.8740623672176	70.3399016157838	165.689929273038	11.1727374830088	15.6826719231581
Flint_173	66.2416377969665	71.4718780111789	166.280518704279	11.803199833604	16.0666316096063
Flint_174	72.5170949151744	73.4797106614444	212.365464454356	12.6561504097249	16.8443195861223
Flint_175	67.9517446807227	68.5925457625242	158.114336587496	11.0575809999792	15.6711082846508
Flint_176	69.1418202824413	70.6086131114221	163.850527615365	9.66454513992852	14.8875152097586
Flint_177	69.4843794637685	71.9972593241578	214.577782297261	11.3779698328449	17.0374850025935
Flint_178	73.4966305520527	79.0683312467071	170.11934071621	12.8866162532053	17.1211930527609
Flint_179	67.2939710015631	67.6447753287748	189.89913981244	11.2819600058773	16.2927014614232
Flint_180	72.163245661625	72.689093262668	180.698309727863	11.0975815425535	16.1723503301051
Flint_181	63.1134441603745	64.4018070401357	145.732546068587	9.0717128454313	13.6721712169256
Flint_182	77.2425377086052	79.3205656350287	171.694516186229	12.9143179352156	17.6748640008587
Flint_183	73.5241223770044	74.7847952815162	176.292589710667	12.3196506025381	17.469000600311
Flint_184	72.1248477235109	71.8658824747631	185.495542870284	11.8783970816409	17.0614534766959
Flint_185	74.7456570333052	77.5993584389482	239.854159211215	12.068938399185	18.6039116398846
Flint_186	70.7404281044968	70.8303402460315	219.223887244041	11.7586665752067	16.7774273772645
Flint_187	73.0317666049088	75.5332926828211	219.55171865672	12.1731511724212	16.7811490945643
Flint_188	65.2359988738206	68.6631890542669	169.333027482328	10.7913958334601	18.2540476248217
Flint_189	67.3092254168776	70.8055302482587	173.315395286514	11.4806211269748	16.4726212960936
Flint_190	70.1486787514899	72.0446000605391	193.072888758052	12.7652166715685	18.1111270210711
Flint_191	70.2895656394841	71.5179774874672	189.211411137435	12.0085883039025	16.5065310944625
Flint_192	60.6119491580718	58.7122937283619	169.089508909481	9.1213359929061	13.2404304601099
Flint_193	59.7359400005379	63.0362096199785	152.092244003687	9.12560371951027	13.6719208678844
Flint_194	74.2966285996017	74.77519020445	157.592649518514	12.985281661857	17.6945581635107
Flint_195	71.7437253127824	72.2256329928208	137.54109398518	12.1457897875494	17.1196847197521
Flint_196	70.0691302964647	71.2684413478405	182.281622978816	11.7347173270153	18.0235114875671
Flint_197	71.3259268936922	71.9771005997082	198.384270782288	9.60523391644011	14.9987915433584
Flint_198	67.0671064706826	70.2734265780454	184.911122346414	10.3386021582869	17.1164675255635
Flint_199	73.8262608870654	75.9124253832392	184.367383992186	13.7347029913251	19.7229752943678
Flint_200	66.5874521657741	70.0315796209353	189.625434862377	10.6308154258443	15.9810544652019
Flint_201	70.5975539153639	75.1648633135745	195.06792287381	10.9703223135757	16.0599580823043
Flint_202	66.6911443247848	67.599970258846	163.314172081189	10.591909809475	14.7998248796391
Flint_203	66.9409468120017	69.7691060933432	178.772430289204	11.9042734754719	15.9237212153422
Flint_204	61.1937900087767	63.172505353158	106.819360712069	9.1367178722952	12.9854711097915
Flint_205	60.0531270069012	65.3660118936931	148.038923023321	9.2661134392626	12.7792131520963
Flint_206	58.5100289137979	60.59965902839	146.965147587509	8.70607227164227	12.7980552842109
Flint_207	66.3815531686699	69.3271287334299	148.859241473126	10.1093689719737	13.8011265474006
Flint_208	65.3734734906634	68.0780747113544	162.348782121698	9.66029049316476	14.9835947505306
Flint_209	65.3181851376633	68.9614737878717	153.359975895292	11.3304103494253	15.7683788350365
Flint_210	68.340612260634	72.0228875202887	182.583884573218	10.9415067759902	15.4903831607885
Flint_211	72.6416226813521	75.2185772864778	184.879543238782	12.3670506433812	16.796232110384
Flint_212	68.9723865989312	72.0887989205993	198.99224656982	14.8127378184584	18.9007589273746
Flint_213	62.6664388851725	64.4219963957599	160.556373818606	10.69618238298	14.3900539651366
Flint_214	65.9435984031434	70.4354298483546	162.743036732415	12.4728551805216	16.7745813123586
Flint_215	64.2175451231256	64.2479280112628	150.223341181084	10.9300007538807	17.3088549321893
Flint_216	64.0833389999605	66.1968543948283	184.416136802132	11.2554197678383	15.8900151219082
Flint_217	63.9510618567175	64.6613260013754	147.568179042024	10.7730163923566	15.2543535819428
Flint_218	64.8622948837137	66.5659189359913	210.333163580343	10.7683098301393	16.1835843634679
Flint_219	64.1057201021954	68.5359277418629	177.567855767547	10.230955628082	14.7582066621787
Flint_220	65.6128216979132	66.2028913991422	170.27846307785	9.30603474980083	13.5081158116336
Flint_221	65.1177020328219	67.4342603782781	168.483759927614	10.5228128507039	15.4218097816711
Flint_222	58.6349318385919	62.2645914223783	147.122603575091	9.55994330864523	13.2842352229219
Flint_223	58.5773276973164	60.7950553966128	120.264844503081	9.15635901091443	13.2470871282786
Flint_224	59.633963592354	62.0500182359698	165.66895922021	9.55173074234379	13.0700445818763
Flint_225	61.1979836139272	63.8757190825352	172.282545591797	10.2686571975666	14.0950708692678
Flint_226	58.0679651652332	61.0105135288852	133.352131204485	8.0770099763283	11.8921702460999
Flint_227	57.4791990432289	62.0805526210298	134.296788022812	9.07840639278318	13.0689341196101
Flint_228	61.3422500592333	62.8647757016812	183.899700943069	9.14493417971261	14.1204776482275
Flint_229	59.3370440677611	60.9216999986162	135.771055457105	8.01937376341978	12.7117762189267
Flint_230	57.4113577156872	59.2160805377992	192.185456168598	8.80157396501631	12.7136349181992
Flint_231	74.5154168448847	75.9262813728791	207.148830326867	13.8257946919134	16.7559900395422
Flint_232	65.9385600847315	68.5642654908524	184.814656647234	11.0091295009404	15.6859238237641
Flint_233	64.8486218270265	66.4687799375687	121.101546754355	11.1081485033407	14.4213011830278
Flint_234	62.7696333322529	64.4064265986406	183.774119429205	11.1340112803377	14.8788288774792
Flint_235	67.0749945023952	70.1856173376305	161.38944666814	11.0902101884344	14.89067605003
Flint_236	60.162492950471	62.3013133163771	170.455224108109	8.7125426663973	12.9716997867768
Flint_237	58.0786500697487	59.0958650401718	152.993847018042	8.55725775527101	12.6970533486852
Flint_238	64.3131718833676	64.9002813150607	156.729878091414	10.562544852587	14.4222365341882
Flint_239	63.0618054716205	66.8597280220345	171.158925826655	10.3530501869247	14.0431900765789
Flint_240	62.297883407334	62.6547096193304	123.933311333524	9.82752647890268	13.6597981316938
Flint_241	63.283636936068	64.3129418977325	180.52117908555	10.2026783705222	13.7741108796266
Flint_242	63.783620498282	64.6859605304767	172.249005691681	9.94537377421569	14.2911116385394
Flint_243	65.2653614469864	66.4216678692871	172.860343998747	9.90627860831221	13.5953442892099
Flint_244	62.6324426832693	62.6036998064427	196.573254775637	9.4704100469555	13.253875141993
Flint_245	63.0953358495335	64.7292333757247	152.874216041207	9.39792291022289	13.2265895403427
Flint_246	64.7621239316416	66.2175650852416	161.527695895259	10.2097365079918	14.5466002511889
Flint_247	62.6156995067253	63.541223126262	162.221936345975	9.52986060641168	12.6209683866291
Flint_248	60.8347814509714	60.6248642940602	173.291378839051	9.15889568951741	12.8016677771014
Flint_249	66.4322654243453	67.6506621678785	172.229876121132	10.6487300215888	14.7778868539341
Flint_250	67.0825142226073	67.1525715403858	162.178261207429	11.445408527252	15.2519498670999
Flint_251	67.2375505721232	67.1231003919023	147.634550487452	8.62608239795929	12.4480299791743
Flint_252	61.1245298522135	62.8274717369482	180.54107202214	8.89334161003146	12.7737670155768
Flint_253	61.867725099347	65.0862411571328	179.095738819627	8.99155514960327	12.6778030925566
Flint_254	61.957377730553	63.7711233853623	181.112993034869	9.31459594568884	13.3788029081154
Flint_255	59.1249026868189	59.6756974098008	154.145632265095	9.20517371995425	12.6071281475392
Flint_256	59.4966640228254	62.6128021795067	157.341183143576	8.32512914607077	11.6574651402899
Flint_257	57.8898237477238	57.9757217011898	160.324860143451	10.3797619679498	14.0404837806474
Flint_258	62.4828786863877	63.0491221902006	152.876078486035	9.64467580821845	12.9368822412838
Flint_259	63.4834876297789	64.4970320345749	187.82861092918	10.2048908978886	14.2593455627043
Flint_260	62.5260171935402	62.9037321082067	162.900947167176	8.37533148772235	12.1480031694157
Flint_261	62.135648593025	62.6818197536327	158.666404305618	10.8420011818546	14.8716834544459
Flint_262	69.6276065883171	70.571414969618	202.967014178201	12.0987676146155	15.9880070634046
Flint_263	60.3372205565794	61.4802312869515	150.697755783402	8.08731734220174	11.9686767410838
Flint_264	62.0868111353083	62.8760101987007	124.898369198666	10.9464694368459	14.3330012438215
Flint_265	62.8543059904441	64.1468756789364	180.433931694224	8.85136056331696	12.6057916151549
Flint_266	60.7709848785287	61.5336419409114	162.238895415048	10.9301359055256	15.2162133476968
Flint_267	60.7773182605649	60.7071931702421	166.799706800346	10.155330647804	14.4885212255626
Flint_268	64.6428733345507	66.4170026450727	191.592984867814	10.6269237324531	15.7105704523285
Flint_269	62.771222372168	60.7169324019882	165.451341265487	9.67386662307446	13.3052860132068
Flint_270	58.7859056432109	59.2174782782842	162.306665271759	9.29837752882714	12.3826023648126
Flint_271	60.8219600600963	59.8316216412636	195.929387037916	9.93424564289197	14.0589295196184
Flint_272	62.8052995565963	65.2666542595054	185.444134537102	8.90231158291131	12.8182998803562
Flint_273	62.1581269806646	62.8254388249414	182.456023213804	10.4911426060651	15.1793032129386
Flint_274	60.5558168950452	61.3166594686398	172.99854244722	10.2327488901004	13.7748816915445
Flint_275	59.6176054349512	60.3427456179767	166.703286993799	9.27327249707298	13.7833779017317
Flint_276	62.7911964429998	65.7237667024129	179.282375508165	10.7088066520301	14.0207729614334
Flint_277	62.5701478393491	63.1305278805932	206.132830910203	10.3893482232517	14.7052168335565
Flint_278	61.9899177206821	62.6645987090841	179.022402860267	10.5557133465063	15.4813941747011
Flint_279	65.3808435281214	70.5181667871613	182.842177593406	11.1864738817586	15.4355078762135
Flint_280	62.3516997876233	63.6524125340109	191.064833642349	10.0596482255067	14.9997331469112
Flint_281	57.8451532275384	60.9751578377625	180.277287509868	9.98931944865676	14.0293459831857
Flint_282	62.3955433239821	62.6684500706682	177.283326196187	10.2051303854301	14.2850243235746
Flint_283	63.4127051192386	63.5769747007825	183.373178893958	9.38076653942612	14.4467696445047
Flint_284	61.3515238867509	62.6122714312016	153.126224424721	9.49595057780769	15.13590236428
Flint_285	63.8403647680371	66.0083328956157	165.377549654789	10.0399046011859	15.2567381731804
Flint_286	69.2156929812803	70.9039386454144	188.706256153945	10.2717450315579	15.2592818965338
Flint_287	67.3478905610644	67.8269591096037	187.918499082727	12.2145813994529	16.8258838762796
Flint_288	70.1901376264039	70.7690032690129	178.55031039517	11.8303254433082	16.6473082616337
Flint_289	68.0353055830383	70.7090317172333	218.115138866841	10.9971299105024	15.7219037269581
Flint_290	67.2376518362652	69.2961963556282	202.735298786845	11.9902246687357	17.3603590539656
Flint_291	63.9587880545335	65.1245299234603	192.01386875895	12.0714495071903	16.3348021301844
Flint_292	63.5402436699499	64.5202372027625	193.786414926572	9.89961962433917	15.7651859360969
Flint_293	62.4498331892212	63.9939639271149	149.471637283904	8.27375001469319	12.3152630807162
Flint_294	62.2922668016689	62.8903536699375	175.584723618211	9.48429495139082	14.0636065756667
Flint_295	64.2914443008572	64.8737254733922	171.60995725947	9.61175063281902	12.9479712809088
Flint_296	62.0967038638893	64.3164022450811	175.541006216588	9.49643178737826	13.3065560989656
Flint_297	62.1916355796644	62.138253457094	174.194147344992	9.07299306001557	13.886351929671
Flint_298	65.1153641784052	66.9659713706821	191.395199424772	9.30762436587853	13.4838772409387
Flint_299	63.6554244375319	64.6030239884127	146.112683203648	9.63003775086619	12.9459172361655
Flint_300	58.4465951031217	60.7528030823754	190.904544479477	10.3653969497141	14.3619811404142
Flint_301	56.3018933109427	60.0770189138466	144.381261877366	8.23296628184344	12.0335138324938
Flint_302	64.6200609629334	65.4799253638282	133.023244713251	10.4503049869	14.6324089901224
Flint_303	63.7177679938253	69.1630398080425	143.190697087897	9.81875842372742	13.7897363285821
Flint_304	74.461668088953	76.2773650650947	198.767601787304	14.4590835839075	18.8970558472187
Admixed_1	64.3742968398435	66.1182007714802	190.923721452774	11.8272279577403	16.0521010441984
Admixed_2	64.0536917118353	64.9885252305964	187.800156066363	10.4439819664191	14.90383968451
Admixed_3	68.4101752608859	69.454640355188	172.735792486115	10.2416276773559	16.098481870757
Admixed_4	74.010642437308	80.2501479028292	212.950896188145	11.2972838637626	15.9278259983516
Admixed_5	68.5225205958877	69.6637777982391	184.977020877205	10.1238820780446	15.0115035587538
Admixed_6	72.4652935001967	74.409575663487	177.612940274821	10.7944162163705	15.4331374562483
Admixed_7	62.8330179357283	63.9735340146323	122.173184717899	9.73356585793803	13.6028935267415
Admixed_8	74.5366530123524	77.5332777882078	189.589406371908	11.5834456600981	16.5111929480892
Admixed_9	69.8666386551894	72.1142861595	132.313010988815	11.2597326212728	14.8866825489639
Admixed_10	72.5569458435494	73.7634919061516	185.934947865635	12.0537787482248	17.56831778961
Admixed_11	68.2772955296481	70.8610356812189	193.163527435164	11.4937157934819	16.8723168643331
Admixed_12	69.0941158726694	73.5155004399215	182.791682080484	9.35814091399836	14.4276437628972
Admixed_13	78.7132441744072	77.8556665008759	218.989909058395	13.7122444739829	18.2473983124391
Admixed_14	74.6938427474079	75.6417402890508	223.228923489263	13.1564342171305	18.4958235838535
Admixed_15	65.8219086325458	66.6076059217117	189.820208327543	10.5566860378355	15.4007565337695
Admixed_16	65.2654909336523	65.4122283120298	156.027052925226	11.4907347946774	17.152549158683
Admixed_17	66.4440061588363	69.9454512113922	158.838934292254	11.937299629693	15.7769113547186
Admixed_18	73.049508370956	74.1692836520502	190.613828140076	13.1787280896259	18.501410140723
Admixed_19	69.0007841119561	70.636239948692	168.231475384372	11.0364934940536	15.8965600986921
Admixed_20	69.4825039101708	78.8324764694008	228.086529086888	11.6244453359456	16.8915253450315
Admixed_21	75.1977118381316	74.741896791537	247.925765307815	13.0708827592934	17.548117813657
Admixed_22	66.3404396168299	68.4753344915479	193.203216376309	10.830832226841	16.0033336075093
Admixed_23	66.6047760352497	67.9329329845267	192.827414735695	12.5028663848665	17.256758735291
Admixed_24	65.5111991287552	66.381351088579	172.360982620709	11.5985972671626	16.0254702222232
Admixed_25	69.9966993334959	70.7773010395698	242.75646430499	11.5084496856101	16.0953927457836
Admixed_26	63.9725455007873	64.7280176772861	166.490633897622	11.1647124290388	15.2905216933526
Admixed_27	72.5529262551699	74.72815517542	218.471917312927	12.2083018930464	17.2648992659575
Admixed_28	71.4736560835235	72.8137487675196	185.118530804987	11.5364454680984	17.4256481141504
Admixed_29	70.9846827498347	72.3970255704045	182.862150152732	13.6720024494578	18.2688643468158
Admixed_30	68.6953418089346	72.1662133192978	161.400289409108	11.3030713331429	15.341946848453
Admixed_31	77.1592281403649	80.5698778297408	205.891472420209	14.7235084942565	19.7202908913172
Admixed_32	68.5680319310172	71.3733146058521	194.206655970372	11.0300614391756	16.0090686091566
Admixed_33	71.1412230431364	74.0559048492251	230.356087430004	13.5474854729124	18.7627144078771
Admixed_34	76.2899352917013	80.7532121056942	222.468545175424	14.1361385830097	18.95408110978
Admixed_35	69.2399760164741	70.6161836353347	145.064759240031	10.5507912361875	15.3234062126053
Admixed_36	68.6731415439662	70.4419057046957	151.076471203948	10.3971315338755	15.167526706518
Admixed_37	63.9723623960277	64.565035409066	144.711851331862	9.15819045366381	13.6746977293201
Admixed_38	67.9235558064418	68.9046185854457	183.648395279436	11.2681945508855	15.9307071435865
Admixed_39	66.7265276754649	72.6318218852652	219.696592904275	10.2595266947909	15.8248343600644
Admixed_40	66.0168737795889	65.4053145645715	148.202017151118	10.0031685526784	15.0426701518652
Admixed_41	66.1940398532588	67.1787578919795	157.296171856137	9.73161736575622	14.0365260530887
Admixed_42	64.8027883363711	66.2976888401214	170.138992601885	10.3085783790872	14.7016157754784
Admixed_43	70.3151281070126	71.1841041732898	149.759400241412	11.0172140657727	15.7119427195476
Admixed_44	71.3829754454817	72.5732940034358	197.578215237085	12.66061779673	17.153990450237
Admixed_45	70.5382480578274	70.7848369060117	174.700445605106	12.2465986802762	16.6292504763489
Admixed_46	73.3370430674599	75.0767799018372	206.347803080319	10.7534618633968	16.2785181403119
Admixed_47	63.1452343738253	64.7759235334151	159.155296833936	11.5835021072659	14.9527740641698
Admixed_48	68.0357072763143	68.9981588383234	160.707671206313	12.7387568366922	17.4614558991181
Admixed_49	67.0314339632839	69.1525540277987	156.390071928714	9.55379631399963	13.8681671569012
Admixed_50	66.3325076663071	67.6019393474519	208.380898983802	10.3411191432395	15.7889348649728
Admixed_51	66.4216081484673	67.2908309752599	196.683071102046	11.6021741959191	17.1386981057119
Admixed_52	73.312180488519	76.8267861494898	218.528670650026	12.0372353986115	17.0794447127499
Admixed_53	68.7139530960282	68.0292677105448	193.446354100802	13.2457513247838	18.0464323527782
Admixed_54	69.2605290443543	69.7729404196533	233.522757151699	10.0552117171348	16.1131681174656
Admixed_55	72.0451923886926	72.8732152215392	245.412053229858	12.4118174364255	17.2467566545524
Admixed_56	65.004850999655	66.0467940093659	170.523601010371	10.8140377827882	15.0286523820432
Admixed_57	61.7434859457624	60.9674763471877	179.331677413167	10.1534124906621	13.6323406034863
Admixed_58	65.6542191418122	66.6783433087672	159.200981766345	9.98352632066946	15.3821337469144
Admixed_59	62.9330404877828	64.1286928068508	175.97576473824	9.86162274550773	15.3480476969726
Admixed_60	66.324848964593	71.1555744455148	164.720960507486	10.9648312187473	18.7474178285264
Admixed_61	72.1018679813851	72.6469489752479	176.163741763695	13.7689743360583	18.4073264855896
Admixed_62	73.4296564441242	76.7910410306598	182.573918279244	13.9417575660121	17.0145695377465
Admixed_63	67.890248229798	69.2557928081211	144.996154296527	11.2470821107476	15.6676833388493
Admixed_64	63.102394859831	64.5836130014252	99.8779490632198	10.431341247285	14.6114030582365
Admixed_65	66.1773877497878	70.5783781319595	139.035680426835	11.1487808594525	15.8544408676613
Admixed_66	69.0511308806238	70.3555841031578	167.928818104116	10.7469132309466	15.6411462242269
Admixed_67	65.9239832051405	68.1466274101452	136.34295197816	11.2565147786793	15.5935515839385
Admixed_68	66.9353431269034	66.6133046713978	244.156103781963	10.0374266143925	15.7331998394981
Admixed_69	64.2612381765609	66.0616105129367	215.196419509703	9.88762735874833	15.9446960588674
Admixed_70	59.6404836151575	62.5353297572188	155.9187994049	8.19948185492227	12.2991203496383
Admixed_71	64.5754890382738	64.8582862386188	152.460766282105	10.0326119297926	13.9259462610054
Admixed_72	64.6062060537051	66.4524297783873	185.499006316326	11.5252632791764	16.1330689261198
Admixed_73	65.4294412156593	66.1137536350004	187.35995938554	11.1035536582264	14.8686203870422
Admixed_74	63.919591102135	65.0445076834062	196.799298850646	10.3268661152203	14.0467943774492
Admixed_75	70.8791050153694	72.4896236237502	199.174909826208	11.0667440512199	15.0929192054828
Admixed_76	70.1303883060306	71.5199360741011	156.004804407975	10.5442836620878	15.5937810752158
Admixed_77	71.9398251168184	73.4055282181763	206.14118322853	11.8958783635958	17.6741463840837
Admixed_78	75.0993516875739	79.3270869041137	190.446893996835	13.1836315266359	19.3631907712585
Admixed_79	69.1653023696967	67.7563927997028	177.800653192081	10.4950899265201	16.6318864965863
Admixed_80	71.5730011345285	75.7754554297569	166.20803295032	12.0335819289198	18.5271893882995
Admixed_81	66.6374812656633	70.1819605480474	209.131264800281	11.2634381690099	16.0840056606862
Admixed_82	69.6590524010864	70.5162305791888	163.069733788475	10.6849850692107	15.2371264870633
Admixed_83	73.7778290594859	74.9188740445747	185.106349137949	11.7571551338172	17.2250697714501
Admixed_84	68.3903248493476	71.2340747097624	173.440276807767	10.9165867521273	16.1102838930975
Admixed_85	69.1417670574359	69.1085032023919	211.358743490653	12.0317434825309	17.7660872899644
Admixed_86	63.377169377532	65.5524210755615	137.453119984701	10.119954646034	13.7722174581408
Admixed_87	67.7341167678657	68.8592395885009	168.823705429842	10.4705801044927	15.8823690797413
Admixed_88	66.9803728909368	67.6759463689251	175.750924011072	10.6829898880518	15.8284779759827
Admixed_89	74.1598145044389	76.3243653576304	194.477667252743	9.80892814720936	15.511340217142
Admixed_90	72.4149250548032	73.6612733577907	240.668632939351	13.9428074016463	20.6867865282991
Admixed_91	73.0053228438167	76.7351059466215	202.489022781232	12.8365800726318	19.6218355428723
Admixed_92	69.8407720475234	75.1262433333926	191.098351736465	12.1898865995195	16.9711374060475
Admixed_93	67.0105726228003	69.5064657640142	194.959355450161	12.9888604083155	17.6250317973013
Admixed_94	63.470397064458	65.9365930069544	156.698438702504	9.35000330532086	13.2028514437957
Admixed_95	63.2719739552763	66.1823722314444	168.262161446318	9.63764997114826	14.2884703421604
Admixed_96	62.9022914913047	65.3312261130307	157.321564113483	9.47947618147256	13.59308634914
Admixed_97	65.3659683376567	70.4478128887198	165.039281502517	10.5766627194273	15.3714790463788
Admixed_98	62.8395516575042	64.6362103639791	173.013892067874	9.787198499001	15.1406307020892
Admixed_99	66.0357594557266	65.7045580238588	179.713555516814	10.3353366220636	15.141278327822
Admixed_100	64.5361842339057	65.8178922665205	175.445056000045	9.83477133871705	15.699351244282
Admixed_101	65.0370796624341	66.6839145431929	159.222677199706	10.2723760797603	15.7575047965409
Admixed_102	71.797809139559	77.6398158023918	151.831526723871	10.2989064226452	14.3301731994472
Admixed_103	66.8861911290734	71.181748024798	194.435703594094	11.0368063629452	15.3554063175388
Admixed_104	63.909478531431	64.5513303612049	141.246786339022	11.0708613803691	15.0921632852285
Admixed_105	72.2024041742531	71.8477673833819	188.662256503043	10.8635068742497	15.3054777445683
Admixed_106	70.0710067374804	70.4514131374775	215.773605798727	11.5094140124503	16.4419516708593
Admixed_107	62.0044285049991	64.0442874690007	181.952503354032	9.33747448459132	14.1595224690589
Admixed_108	67.2749034231225	67.4527674423076	196.025860967202	12.4095795880802	16.6105540255036
Admixed_109	64.0098620324916	64.561090220184	214.543276967609	11.0944407615141	15.7105742418071
Admixed_110	70.3415370745393	70.7308638175676	146.249359555223	8.77431952800562	12.4129606822303
Admixed_111	69.376224735214	71.0089748280205	155.649033082622	14.3081673249357	18.9241834813233
Admixed_112	73.0650718427851	72.9529093353938	224.275466818135	12.0062238922919	16.1788524848936
Admixed_113	81.0789391051045	81.4029412818778	210.085397910184	13.5072458162164	17.4827931395443
Admixed_114	68.4301661928269	68.5599511265673	142.871101491652	12.0798809796272	16.6965285114566
Admixed_115	74.9748922933668	78.6218002989436	195.729158301601	12.5028085347963	16.7379488452416
Admixed_116	75.6799729034073	80.475318737728	220.550418414459	13.0279001716619	17.3624350209955
Admixed_117	76.3234799210084	77.4257947640461	206.63890895463	14.6611233845173	19.3547553859741
Admixed_118	63.5882781448607	64.3493009670248	213.798563093876	10.5251108669559	15.5903959101175
Admixed_119	68.009318210241	66.9799025756043	193.536300592546	11.1891667632881	15.9221840738116
Admixed_120	62.7169228994225	62.8325771249334	151.402882599878	9.90538943169103	13.8627124811305
Admixed_121	70.7151582481705	73.1116657367647	223.493019452214	14.4457886700374	20.1603784358087
Admixed_122	67.4997106332406	70.1862574360314	172.733387250746	11.4281989199229	15.6677736081365
Admixed_123	65.3662536120344	67.2380900555734	187.433279618897	10.610146846134	14.3104487458914
Admixed_124	63.9463834710773	64.7465518287824	165.159751001172	12.6068030751174	16.2234649901875
Admixed_125	73.223413853606	76.2169029100211	218.507170293499	12.2009559859941	16.7369335822415
Admixed_126	74.9939063931033	77.2485591473108	193.876857676727	13.0454241565888	18.1337934542533
Admixed_127	76.750629178144	77.5054833332937	173.475516984293	12.8587619032921	17.7658546495222
Admixed_128	66.4761169967979	70.8410633193805	150.576332655045	10.5451643218728	14.5922972678093
Admixed_129	63.7130539534065	63.8575875853912	148.079294245273	11.0484014448732	16.3562223934752
Admixed_130	63.4822244640679	66.3505739786267	178.835369322803	10.5664497415157	14.4293928457654
Admixed_131	63.3138141559775	64.5849008185949	146.916892200343	10.8600472329565	16.1321029388666
Admixed_132	68.2025656635811	68.2462966172025	205.087419111412	10.1546103491285	15.0217311164809
Admixed_133	63.5326397197326	66.1329063941278	205.256148581457	9.70515153189347	14.8405786259229
Admixed_134	63.9772772962257	65.3360322356568	163.397272512366	10.4650762312956	14.6759863686265
Admixed_135	62.0289840449199	64.931182044932	185.911834082501	10.6842487207268	15.2108799079479
Admixed_136	63.3439314417764	65.8989069267284	188.810104491177	11.2788252193202	15.5815179838903
Admixed_137	63.5843883262588	64.3196695345066	171.949867823501	11.1475559608295	14.9131623823902
Admixed_138	64.1790916661127	65.6039738472628	190.055311038086	11.596666757852	15.5977444278323
Admixed_139	70.5759481944741	74.1389944795762	187.260858575357	11.3586414589256	16.7477883605417
Admixed_140	61.2596412904206	61.5329573241008	173.573357935157	11.6281030384762	15.8479442846165
Admixed_141	64.6112053965277	69.7829577958597	139.132294178056	10.6245484938392	14.7585178273125
Admixed_142	62.7829337257687	64.5952920565571	148.124222045141	9.66847025435494	14.4056397442202
Admixed_143	65.4330250031287	66.3259940692054	182.514075483483	11.3740419533689	15.6354581084707
Admixed_144	63.5318942170094	63.4747850642847	166.379373254413	10.5968894090009	15.0793995883704
Admixed_145	66.5974356704601	65.2391164517158	186.090017580338	12.1717383971043	17.3043638180493
Admixed_146	66.1702142344961	66.9542985538434	170.746145782803	10.9667384265358	15.6971118595019
Admixed_147	63.2813694612802	64.3719780397433	165.162043690466	9.63901749887307	14.5613011365188
Admixed_148	64.1410402198477	65.8779994002721	172.639677028283	10.6230935789595	14.6181209818014
Admixed_149	61.4320101850447	63.0172210392849	155.796263838002	9.08483203067054	13.9977035661317
Admixed_150	68.3865872908017	69.0661255363096	188.995678735555	10.3725139058952	14.8928172990103
Admixed_151	66.8626899875598	68.5345255133455	211.00117634658	11.2975390232805	15.7820477352764
Admixed_152	70.4077973175206	71.8243280495745	200.586129060807	12.9189762278	17.6008166186539
Admixed_153	74.6572176362739	76.3789199250551	189.756523530471	13.5163609261767	16.5856342328576
Admixed_154	70.2567162396012	70.7511148001667	196.740427532449	12.022919646207	15.968865048727
Admixed_155	64.5156525327667	66.7356037958127	166.2395192162	9.18901218633407	14.2634354553223
Admixed_156	65.6876330838495	70.9355157451492	178.920731132851	9.34068732501133	14.9518145462692
Admixed_157	71.8287312223117	75.4116095045781	203.488200638853	11.5743705477513	16.0588129386541
Admixed_158	70.4858391975159	73.5953707735038	263.109050021915	13.1969336845965	18.1986823140085
Admixed_159	65.9943114523581	67.1794028760436	166.722697482677	10.6246514012928	15.7039005968966
Admixed_160	70.3884843965911	75.7001349658862	206.904171296132	9.12071906595568	15.7840305674213
Admixed_161	66.788328119812	68.779954339209	180.229412639561	10.6510901026557	15.6499739857276
Admixed_162	65.9710056649434	68.5780018400764	194.619092020653	10.7922619791101	15.8079889542477
Admixed_163	69.17212143466	68.8760889436341	177.039833227229	11.9929739279909	17.8468520314291
Admixed_164	74.0316410997466	72.9491014407957	258.155944438401	12.7565644818817	18.5773653429424
Admixed_165	68.9690920227603	71.685431967902	206.290664450553	11.7972059042239	16.7695388954718
Admixed_166	66.6493744448373	71.7927776392411	132.174808221126	9.69502446643553	14.3381168430272
Admixed_167	70.1014315877559	71.2353587243123	155.75979519701	9.27641381332224	14.3387632705745
Admixed_168	69.8944271884367	73.1161348677199	183.053556952196	10.7391036042101	15.8814415980882
Admixed_169	73.6728557691399	74.5497974562054	209.312289162914	12.7033831547364	18.6544757481082
Admixed_170	66.4099430740454	66.9625186810466	162.302120089953	9.34387718465493	13.5412584930488
Admixed_171	67.5165821318581	67.9117437989318	143.002861115818	10.9330756001548	16.1738955704132
Admixed_172	64.6303350005328	66.2482868836482	143.422070186655	10.5111001024084	16.5027729873551
Admixed_173	65.8226607145508	67.0259873121402	129.047804509369	9.64997519193541	14.2050085656855
Admixed_174	72.2054305147746	74.7219961360303	174.173524821973	12.9310875144049	17.0381864547627
Admixed_175	73.0673674147485	74.6372511006057	203.187315016006	12.7006493526429	18.3194235277977
Admixed_176	73.4978882249973	73.2232792253141	165.575462240088	10.4813303918183	15.1787049613968
Admixed_177	78.6149178947169	81.1020504744821	216.340596756421	12.0186576992831	17.3878660217239
Admixed_178	66.1909570310896	67.7739676906267	178.633384920361	9.93715921581926	13.8849724299479
Admixed_179	70.0422493257144	69.9661043541643	193.326135894396	11.4526751906653	17.289463588773
Admixed_180	66.7142364160908	67.9503363857332	175.204966201037	9.99943072460122	15.1296104141752
Admixed_181	70.798366309592	70.9651073235845	191.888882456786	10.1557640117473	15.4094663367059
Admixed_182	66.8843373778977	68.5521948027603	221.007897186244	10.5138946619767	16.717918927042
Admixed_183	67.9727437271947	69.9845588652543	183.749009190722	10.1574632661235	15.2759374463503
Admixed_184	67.7567814822805	68.5432273085538	210.020742747123	11.8308200801517	17.3863304243187
Admixed_185	84.7983697446822	84.7006797266757	227.962282672504	14.8200764390633	19.8750778505397
Admixed_186	64.8868329124215	66.0730119322934	169.201536678064	9.15094070088851	13.475503946875
Admixed_187	62.1585776638757	65.6214476856227	204.645160917073	10.5619013768315	15.6070479435745
Admixed_188	72.0855376602666	72.9716532852054	153.7603664317	9.67591111883103	14.4226495581292
Admixed_189	67.6022857766229	65.9453232105539	154.998741043645	10.9183319177826	15.9197632113693
Admixed_190	66.5070624524748	66.1509838384401	234.492145496937	10.7496898121961	15.2962347758473
Admixed_191	73.9397610093034	80.6525359703124	226.216478729087	11.6076074029245	16.9191899447551
Admixed_192	71.0420412305361	72.498746039051	218.875970167113	10.6415670698303	16.5819958821767
Admixed_193	76.0655730629638	78.8019365602932	234.119335241103	13.2290964681097	19.1331683452095
Admixed_194	64.502329833854	65.8778076348909	185.276998060593	10.7826094134494	14.8774865164427
Admixed_195	70.628465615388	71.9012997131972	215.209087193738	11.681566116686	15.5289565781741
Admixed_196	66.193663711745	68.3622913033313	209.745675871607	11.7570397340636	15.7325742599408
Admixed_197	65.3207217396015	65.9084780270721	197.259542427381	10.7268674316248	15.1365211504481
Admixed_198	63.6447786324119	69.9178152747645	169.669267134134	10.0857001341263	14.9009703352784
Admixed_199	64.9905528423208	71.9298095789699	166.892378173835	11.803312457043	16.0786625635662
Admixed_200	61.801924962365	64.4279711148488	159.609249037957	10.9772254914268	14.7999499311494
Admixed_201	80.6352442598748	80.9462170461865	205.057723576143	13.415551632228	18.1650592782185
Admixed_202	71.8536055463291	71.1224285800238	162.752920594195	11.866079306003	17.4172308353932
Admixed_203	66.5348438384913	71.6827849564675	175.41030335368	10.8447372265668	16.3152655603515
Admixed_204	72.2650825116215	75.4750889344927	108.182351424657	12.1271040320985	15.7236134915596
Admixed_205	70.4469207750523	71.8414291942683	203.123168003343	11.7492937303891	15.9226596678805
Admixed_206	85.3249784234231	85.4896375378582	215.516132460914	13.313356500762	17.1569990681409
Admixed_207	67.2835142597509	68.7503506628925	159.240728212022	10.2790453930402	14.7632866519725
Admixed_208	70.3778368913096	71.5659108227755	173.488636392851	11.047628112352	15.7643628752093
Admixed_209	69.489966814204	72.5159262196988	173.8413317285	11.9839619713096	16.3042623500132
Admixed_210	72.3488935949427	71.5708534749988	190.071484778784	12.4539416496319	16.8917867487957
Admixed_211	69.0959771898462	70.2916039540642	168.590274692205	9.26349589022097	14.6749219169356
Admixed_212	66.3271704560848	73.7735439798278	169.544269612018	10.26204812061	15.7427076313862
Admixed_213	68.5811199472609	74.7839341032683	141.957920278818	11.4974199809355	17.0621660675676
Admixed_214	71.5165237508228	74.2066951811381	173.999713371144	9.28542096775904	13.6624305149701
Admixed_215	62.2801530305584	64.8486403361701	141.032726789475	9.6215640707917	14.0426970142603
Admixed_216	66.9098713183311	71.9634465603166	169.595657027988	10.5904116894577	14.1573467198446
Admixed_217	66.8321125365692	68.0057911035874	161.811965078417	10.9192727982593	15.0655108139898
Admixed_218	62.9241450019112	64.2810416767861	195.338783976304	12.0471766241909	16.5571259714676
Admixed_219	67.5466742375637	73.3414573457225	178.947762256036	11.8125739491224	15.0535424021196
Admixed_220	64.7916572239656	66.2544969593479	189.125111849424	10.3787515663694	14.2301098110854
Admixed_221	70.1321312145801	73.6417289825637	121.69922953301	11.1884707237183	15.8592540999699
Admixed_222	65.2981121832032	67.0564005392382	187.266097818866	10.4992765124321	15.6282292576139
Admixed_223	64.0148299346828	64.6450447392165	166.656114527401	9.87511575117542	14.240966107904
Admixed_224	63.3508192874498	63.2181172983278	174.407505136009	9.70844292507258	13.2322682495022
Admixed_225	69.4409548102107	73.3384512529071	186.609840402224	10.1874636620389	16.2730583748377
Admixed_226	63.89219420447	64.5740324842378	166.900028654514	9.37861707150716	13.8286838568479
Admixed_227	61.9489701307016	62.6499291088502	191.100928294728	10.9428448646723	14.9563300871444
Admixed_228	69.0628168594833	71.7515461701879	192.627670609807	10.8269874891358	15.8067168676837
Admixed_229	70.6952444453174	73.7176178732943	179.550494977145	10.8058335485032	16.3460561428571
Admixed_230	66.3816504065244	69.4258647429134	169.676114928382	10.6299584101145	14.4688077060208
Admixed_231	63.345908857264	65.086841882265	140.392240769511	9.68369764398316	13.9312077540886
Admixed_232	63.4813985866205	67.730931584601	131.519859788731	9.68037203949648	13.5300737121614
Admixed_233	64.436549455104	66.2955240927869	170.757378354053	10.7061003282517	16.7453584131261
Admixed_234	81.9654379764107	80.2898218320475	216.130674316549	13.6814866969589	18.7938564992975
Admixed_235	67.346385140421	68.4855509664973	155.347412510762	10.5079164103779	14.5494402746887
Admixed_236	65.5057158529354	65.7526068899808	168.302202414861	9.41041198222241	14.303545374532
Admixed_237	65.3485854678161	65.1739891570048	167.269958471753	10.0627593498288	15.1413472642999
Admixed_238	63.0196111542001	65.6176501544246	164.035841625757	10.2129149216062	14.1570339095833
Admixed_239	62.8395286543905	63.9424249839551	180.071014174712	10.2328094323464	14.1933715559494
Admixed_240	64.0504056547052	64.9985036410771	175.468480691275	11.6597664176575	15.4957534251132
Admixed_241	64.8119308587867	66.3843594351967	155.758017230438	12.031474181925	14.9157093209259
Admixed_242	61.2091763489051	63.525907031221	129.913061579553	9.56534368279383	14.1776854593735
Admixed_243	72.2881056377018	74.8064195946948	182.83916862206	12.1609770099256	17.9069869554065
Admixed_244	67.402899229334	68.4723904250524	192.924896142367	12.2105303816422	17.2812715659939
Admixed_245	68.8412934700009	70.3253615100164	197.546649441553	12.8198015885696	17.8589653573103
Admixed_246	63.1900522918106	65.8728437991016	140.833115607233	11.0792292754843	16.027762682399
Admixed_247	64.057480100331	65.4968902664615	193.39152626147	10.4547303742638	15.36424049851
Admixed_248	61.8357924762458	60.5946604458746	141.821939420407	8.84985049821493	12.8054050545152
Admixed_249	63.2813637647488	65.4318810518134	202.52396528495	9.69155850432799	13.4573718206543
Admixed_250	71.7436165870867	72.5780530799227	208.490034386184	11.540827745316	15.7260000208247
Admixed_251	65.1722071450813	64.9339822887816	195.696501998659	11.4410538678028	15.4377224811678
Admixed_252	72.910876218259	75.3554005465444	167.056999578207	12.1769978807432	17.0531605437863
Admixed_253	79.4314670916327	81.4185778578932	211.393815151266	12.9800345841778	17.1742600744829
Admixed_254	76.1708762646984	77.219710904739	207.058331558593	13.5668163921923	18.759215361692
Admixed_255	77.4555735850589	79.7208954812205	211.474791500016	13.8670939768577	17.691988044369
Admixed_256	77.2131345921025	77.872864183053	237.404109883876	13.7317355498777	20.7186665967273
Admixed_257	69.685356499013	71.3821907945398	216.564956933459	12.4305079532643	18.524794200644
Admixed_258	62.4501301293789	65.6586733398697	136.089722430493	9.53174667710637	13.2217610834391
Admixed_259	64.5195807054988	65.0402029931564	146.119447645126	10.579294706462	14.5409974012578
Admixed_260	63.6725530811108	63.139445681056	182.328814775352	9.55592607814397	13.8476668384027
Admixed_261	71.7917698717507	72.0226206734064	170.481997221849	11.6641232960968	16.416994656342
Admixed_262	68.6778920005785	69.5462302582846	202.301258195854	9.93345985909029	15.557186138273
Admixed_263	62.652731930472	63.4979521742498	171.557400203694	10.8542666407543	15.2633354860354
Admixed_264	60.0759779819249	61.9587127486562	122.831519802786	9.4691708554186	13.4431559842457
Admixed_265	67.3635353800838	65.8311330504035	170.644561634433	10.1256847802242	14.4201987092144
Admixed_266	70.8194281306083	72.2187570359616	185.237739594108	11.0359000233832	14.4114827892892
Admixed_267	68.2010670705061	72.6473566317295	214.361711954703	11.0460057332132	15.699014870881
Admixed_268	68.1167362818075	69.921930293207	202.511598680358	10.9332568678026	14.7768704794614
Admixed_269	65.7259063828739	66.094238689965	189.48471264411	11.163026908656	15.0386774577675
Admixed_270	66.0416094531228	67.0572968568194	199.343553046111	11.7457678953829	15.6608896995647
Admixed_271	73.7453626553317	73.5916849656535	192.575736505781	11.4895517760487	16.1880958830509
Admixed_272	70.6677052314615	73.3897237338897	223.124032901997	12.6433603512053	16.8204165305149
Admixed_273	65.6183380355429	65.5611770411693	207.858992214922	11.2194608610816	16.1126940528837
Admixed_274	65.6540808625337	66.7923677276677	163.713384836936	10.9209717096718	14.6968537967102
Admixed_275	65.0081122654286	66.3343388810742	158.059290490013	10.3313364515946	14.5633484861746
Admixed_276	61.0862536466334	60.4435026694368	170.277290382156	9.28633394729671	15.2820314110806
Admixed_277	62.8011693466972	63.151107366475	209.475844907253	10.4842584879615	15.0137472390487
Admixed_278	65.1226791822109	67.8985365217538	118.608625452587	10.3214552533311	14.3153204851611
Admixed_279	61.2213369163423	61.9467086411813	124.691402197353	8.96226634645387	13.393132007064
Admixed_280	64.7228950810697	66.4296445763691	171.177243504806	11.8190384755873	15.7531156468349
Admixed_281	68.6468082043124	66.5837787352496	179.39997461848	11.6198057080058	15.4326774448437
Admixed_282	65.4154648491842	65.9561851468428	194.309177653008	11.5868007812891	15.6245026939589
Admixed_283	63.3233293812585	63.5684497765743	198.149222641832	10.677412576865	14.6839167175235
Admixed_284	66.2065802021808	66.3863056379284	184.874879529908	10.7877746900434	15.2052133577271
Admixed_285	62.5849639688892	63.5451777227971	167.723803076113	10.5879776861794	14.6145285788715
Admixed_286	66.7463326061399	66.9877822973425	144.934598512254	11.6219581902372	15.9536848813212
Admixed_287	67.0153083626509	69.4445603486011	169.981841846008	11.1592425505201	16.0378984812092
Admixed_288	66.411882883304	67.2254192312438	180.820553538306	11.0797820351726	14.9995351731703
Admixed_289	69.9966438326019	70.9555267313814	259.031543287158	11.0892501908871	17.437529100524
Admixed_290	63.3615065176854	63.3195152865632	184.498950303937	11.2114742767257	14.514656132848
Admixed_291	64.4778134576889	66.4312323749151	158.52379793027	10.8491512095109	15.439512141403
Admixed_292	62.5831556921061	63.5597999704299	184.715912517228	10.0910860249955	15.1471465607676
Admixed_293	65.5554008330139	66.3850043195478	189.371280231529	10.7240887010326	15.6743017636809
Admixed_294	68.9512017219305	69.5873536359977	204.944565940586	11.9438301333024	17.0457993157728
Admixed_295	72.4071191694395	74.5468589315016	199.684574077688	12.1116175899579	17.927779530303
Admixed_296	66.0114973792119	65.500462344163	160.689206557304	8.83858819004085	13.2261117798244
Admixed_297	64.730740124106	64.9953281871011	182.441560473703	9.95851905563934	14.6507610720921
Admixed_298	65.8620045324146	67.0301075447834	252.174851174079	11.4346439912451	15.9050908776519
Admixed_299	62.7856936515466	62.7276698754683	188.72125004528	9.86502205625735	13.9247716930639
Admixed_300	70.1772782412669	72.0164952485295	217.520381557753	11.0087779083252	16.0971706549928
Admixed_301	65.4076930922559	65.1058734065529	214.190235422177	10.4765238583981	14.949402019442
Admixed_302	69.451988062835	70.3143834287327	167.600718384454	11.1586055270775	16.928070145586
Admixed_303	63.9644244520068	64.9431388341815	160.461485939457	11.3129406528633	17.3125289883307
Admixed_304	61.6745476896461	61.6887964024825	189.840910978753	10.4617901563071	15.1780668152
Admixed_305	62.7492146192871	63.6081991680657	165.384110252719	9.95451112617945	15.023906248009
Admixed_306	68.049090705248	71.7256261594666	179.888148805646	11.805553119014	16.693948915488
Admixed_307	69.3745523213955	70.1225304698931	178.600344009237	11.0234801110147	15.3290195466814
Admixed_308	63.1386187367484	63.7385730092736	181.814327958934	10.5381232100416	15.2248839597704
Admixed_309	63.520114737164	68.52743815782	170.426518974911	10.0071368835443	15.0431091791916
Admixed_310	63.085821296386	64.1167433991261	190.414217836717	8.85719946912261	14.0430720191329
Admixed_311	67.6344098438224	68.7751542536116	148.865170676765	12.4390589252693	17.0721158969158
Admixed_312	65.5189700912495	66.6994181131074	189.500037327796	10.8784204037048	14.941371583467
Admixed_313	67.7444994096606	68.0593706793974	193.599654718052	10.3627057516969	15.4285417749226
Admixed_314	65.6191421963447	67.0733090565801	201.872081111238	11.3759408985892	15.7904536080565
Admixed_315	65.9523274014284	68.3685975970836	165.371893081005	11.6903957597291	15.7917143674191
Admixed_316	62.0219714161525	61.8181013387127	210.215312068082	10.283101361083	14.4069506183163
Admixed_317	62.3479564271748	63.1185872279097	189.651034473022	11.5518456955618	15.4124673148373
Admixed_318	66.7231479824928	66.7846426380718	234.607365092668	12.4261339526379	16.2851812198236
Admixed_319	67.9862287692438	68.5879596679111	202.482743782443	11.1324920801355	15.2292574729662
Admixed_320	65.7696996987977	66.1686686516543	196.674829068629	11.2885994568499	15.1300745422332
Admixed_321	67.8198774796488	67.169049775299	193.589965717374	11.5221261176078	15.6382874913345
Admixed_322	66.8496040637831	66.6369139340861	173.951787918815	11.3219997249562	14.8463781777171
Admixed_323	70.8697077723186	71.1754210196877	213.633307029712	10.9873103211606	15.4951282180413
Admixed_324	67.6622100433629	69.3835768634934	189.339601719132	10.6602775828216	16.2088570794655
Admixed_325	63.0297080889809	63.7358594377033	152.601028794346	9.94155098827684	13.6253138510738
Admixed_326	67.1316977966917	68.3285620492721	216.980834311994	11.229962000517	15.4267951941257
Admixed_327	65.4856556564689	66.3167179864645	200.4713526111	9.83661571326007	14.3674446014406
Admixed_328	63.5288723736684	63.3775653683509	158.569246374021	12.016837265176	15.5039993114925
Admixed_329	67.3143681305637	67.9274122420272	180.374379927703	11.5210613487389	16.108849574108
Admixed_330	65.7859304854406	66.9151297045534	195.490419367379	9.92471139412126	14.8690035194999
Admixed_331	63.5099371185602	65.0882232412233	148.36070208294	9.00936769670779	14.1271024903643
Admixed_332	64.9223717386323	65.2678475353001	191.429089474975	10.8628710566739	14.6089390718169
Admixed_333	64.5726123685349	68.0413248983917	174.700695977637	8.99345443432934	13.8291593221124
Admixed_334	63.1079931497221	62.2778413612276	145.74657388665	11.2122021424276	15.5621044388412
Admixed_335	63.1644360908687	63.7777099340771	177.886244942171	12.73414312183	16.4042405521747
Admixed_336	70.7580891298235	71.30526166058	204.395214857048	9.83717517155204	13.8589533023845
Admixed_337	68.4907423372348	72.9632088241098	231.478228028523	12.3218038506677	17.46774109781
Admixed_338	66.3631429613663	67.4314358355948	181.9748848725	12.1597393789182	16.5455374745511
Admixed_339	66.497435791624	66.0183053243329	170.585522730998	11.4666183705633	15.4874716263887
Admixed_340	65.541666715779	66.6182119726498	170.765670852228	11.7094755713108	15.8307609193739
Admixed_341	64.515166973205	65.3999722433627	169.142085841663	10.0965493350049	15.3714667376903
Admixed_342	71.736319873778	73.4815787701583	181.724974185026	11.6005013606295	17.8651938948361
Admixed_343	63.3907050556729	65.8997079341407	207.594898548184	10.2675845312997	14.5490480712092
Admixed_344	63.4903278124381	63.7938472333304	162.206855091475	9.8957860529917	14.8002526668554
Admixed_345	62.3651120841489	63.5509553484427	141.046049435322	10.3724480531355	13.9942457372182
Admixed_346	63.7415911157274	66.8672325361656	149.493581145892	9.47824304821284	13.8574250446939
Admixed_347	61.7210348244402	64.1985742334912	145.916879113723	8.60682029445935	12.9104070791936
Admixed_348	64.8669929970024	67.3142378203297	181.591290313001	10.647013304612	14.5414845046893
Admixed_349	62.5681486750107	64.3861490413676	170.649319688856	11.2094388315289	15.0730128919578
Admixed_350	63.772527883287	64.2849995697895	197.654734933723	10.4419249558122	15.5791697950112
Admixed_351	66.2072296967058	66.7121811028907	176.758047245176	11.7078590029063	15.7673507711173
Admixed_352	63.1122031530921	63.0581330955354	163.025160613017	10.0035887514674	14.254617628766
Admixed_353	62.244290924542	63.507832368524	142.640475758172	8.88742888706371	13.2812847742876
Admixed_354	70.791055746409	76.6564882135619	209.355391265513	12.316968693396	18.2290883434831
Admixed_355	62.9770168152424	61.5294027013813	153.511775451514	11.4680930786987	15.6701350269627
Admixed_356	69.5891967806874	69.7068612935853	200.7627053518	11.0768230688482	15.4683277251263
Admixed_357	64.2445963088348	66.489363804589	181.392226751546	11.013502165785	15.850451824343
Admixed_358	69.740560237191	70.5749390586807	173.358496879578	11.0544066455805	16.1512235865615
Admixed_359	72.6926179154195	73.175799822954	191.692117934122	10.8264435916206	15.2414182518978
Admixed_360	71.2993884632918	71.2152423843489	208.557505013348	11.5350330905907	15.5240219002663
Admixed_361	74.6482971802195	77.2993333020478	173.128112443105	11.7379798744121	16.4079966456004
Admixed_362	68.3085578047163	69.1519159166994	190.755260363869	10.8462900381382	16.371819254966
Admixed_363	69.2995322292892	69.2009429077592	200.147263018229	11.1767593199065	16.5635847892873
Admixed_364	68.5535215785034	71.2301040156421	198.253530468866	10.6575809387972	16.01650988265
Admixed_365	71.5218466335906	76.5585363182259	209.062983753769	11.8126408337958	16.3192476094241
Admixed_366	63.9885000317521	64.9494824728234	173.288979674323	9.90198535266783	14.7350750189097
